# Supplementary material
Source: PubMed Central journal article supplement (PMC5820720)

## Supplemental Online Content 2

McDermott MM, Ferrucci L, Tian L, et al. Effect of granulocyte-macrophage colony-stimulating factor with or without supervised exercise on walking performance in patients with peripheral artery disease. *JAMA*. doi:10.1001/jama.2017.17437

**eTable 1.** Effect of GM-CSF and Exercise on Study Outcomes at 6-Week Follow-up

**eTable 2.** Effect of GM-CSF and Exercise on Study Outcomes at 6-Month Follow-up

**eTable 3.** Effect of GM-CSF and Exercise on Changes in Reactive Hyperemia Flow, Reactive Hyperemic Average Peak Velocity, and Brachial Artery Diameter at 12-Week Follow-up

**eTable 4.** Results of Generalized Linear Mixed Models for Effect of GM-CSF and Exercise on Study Outcomes (Longitudinal Analyses)

**eMethods.** Detailed Methods for Measurement of Progenitor Cells

**eFigure 1.** Temporal Changes in Endothelial Progenitor Cells According to Study Group Assignment With Error Bars

**eFigure 2.** Temporal Changes in Endothelial Progenitor Cells According to Study Group Assignment Without Error Bars

**eFigure 3.** Changes in Treadmill Walking Time by Study Intervention (N=208)

**eFigure 4.** Changes in Brachial Artery Flow-Mediated Dilation by Study Intervention (N=208)

This supplemental material has been provided by the authors to give readers additional information about their work.

**eTable 1. Effect of GM-CSF and Exercise on Study Outcomes at 6-Week Follow-up**

|                                                        | <b>Exercise + GM-CSF</b>                          | <b>Attention control + GM-CSF</b>                | <b>Exercise + placebo</b>                        | <b>Attention control + placebo</b> |
|--------------------------------------------------------|---------------------------------------------------|--------------------------------------------------|--------------------------------------------------|------------------------------------|
| <b>Six-minute walk (meters)</b>                        |                                                   |                                                  |                                                  |                                    |
|                                                        | N=52                                              | N=53                                             | N=53                                             | N=51                               |
| Baseline Mean (SD)                                     | 332.5 (106.9)                                     | 339.8 (101.0)                                    | 338.7 (95.6)                                     | 339.1 (92.0)                       |
| 6-week follow-up Mean (SD)                             | 352.5 (97.7)                                      | 343.5 (104.3)                                    | 352.2 (95.2)                                     | 341.4 (84.6)                       |
| Within-group 6-week change Mean (95% CI)               | +20.0 (+6.5, +33.5)                               | +3.6 (-9.8, +17.0)                               | +13.4 (-0.2, +27.0)                              | +2.2 (-11.6, +16.1)                |
| 6-week change relative to attention control + GM-CSF*  | +16.4 (-2.5, +35.3)<br>P=0.090<br>Adjusted P=0.36 | ---                                              | ---                                              | ---                                |
| 6-week change relative to exercise + placebo*          | +6.6 (-12.6, +25.7)<br>P=0.50<br>Adjusted P=0.89  | ---                                              | ---                                              | ---                                |
| 6-week change relative to placebo + attention control* | ---                                               | +1.4 (-17.7, +20.5)<br>P=0.89<br>Adjusted P=0.89 | +11.2 (-7.9, +30.3)<br>P=0.25<br>Adjusted P=0.89 | ---                                |
| <b>Maximal treadmill walking time (minutes)</b>        |                                                   |                                                  |                                                  |                                    |
| Baseline Mean (SD)                                     | 7.7 (5.3)                                         | 8.8 (4.7)                                        | 6.5 (4.5)                                        | 6.9 (3.4)                          |
| 6-week follow-up Mean (SD)                             | 10.2 (5.2)                                        | 8.9 (4.1)                                        | 9.7 (4.7)                                        | 7.5 (3.8)                          |
| Within-group 6-week change Mean (95% CI)               | +2.5 (+1.7, +3.4)                                 | +0.1 (-0.7, +1.0)                                | +3.2 (+2.3, +4.1)                                | +0.6 (-0.3, +1.5)                  |
| 6-week change relative to attention control + GM-CSF*  | +2.4 (+1.2, +3.6)<br>P<0.001<br>Adjusted P<0.001  | ---                                              | ---                                              | ---                                |
| 6-week change relative to exercise + placebo*          | -0.7 (-1.9, +0.6)<br>P=0.30<br>Adjusted P=0.47    | ---                                              | ---                                              | ---                                |
| 6-week change relative to placebo + attention control* | ---                                               | -0.5 (-1.7, +0.8)<br>P=0.47<br>Adjusted P=0.47   | +2.6 (+1.3, +3.9)<br>P<0.001<br>Adjusted P<0.001 | ---                                |

**eTable 1 (Continued). Effect of GM-CSF and Exercise on Study Outcomes at 6-Week Follow-up**

|                                                         | <b>Exercise + GM-CSF</b>                          | <b>Attention control + GM-CSF</b>                 | <b>Exercise + placebo</b>                         | <b>Attention control + placebo</b> |
|---------------------------------------------------------|---------------------------------------------------|---------------------------------------------------|---------------------------------------------------|------------------------------------|
| <b>Brachial Artery Flow-Mediated Dilation (%)</b>       |                                                   |                                                   |                                                   |                                    |
|                                                         | N=52                                              | N=53                                              | N=53                                              | N=51                               |
| Baseline Median (IQR)                                   | 4.97 (2.71, 7.62)                                 | 5.49 (3.83, 7.05)                                 | 5.06 (2.98, 7.81)                                 | 5.40 (2.67, 7.29)                  |
| 6-week follow-up Median (IQR)                           | 5.30 (2.86, 7.58)                                 | 6.41 (4.15, 8.54)                                 | 5.35 (3.23, 7.65)                                 | 4.35 (2.60, 7.55)                  |
| Within-group 6-week change Median (IQR)                 | +0.17 (-1.13, +2.13)                              | +0.23 (-1.17, +1.54)                              | -0.36 (-1.77, +1.99)                              | -0.17 (-2.11, +1.68)               |
| 6-week change relative to attention control + GM-CSF**  | +0.06 (-0.93, +1.05)<br>P=0.91<br>Adjusted P=0.91 | ---                                               | ---                                               | ---                                |
| 6-week change relative to exercise + placebo**          | +0.40 (-0.63, +1.43)<br>P=0.45<br>Adjusted P=0.91 | ---                                               | ---                                               | ---                                |
| 6-week change relative to placebo + attention control** | ---                                               | +0.36 (-0.61, +1.34)<br>P=0.47<br>Adjusted P=0.91 | +0.08 (-1.00, +1.16)<br>P=0.89<br>Adjusted P=0.91 | ---                                |

\*Difference in Changes (95% CI). The P value is from the two-sample t-test. \*\* Hodges-Lehmann estimation of location shift (95% confidence limits), P value from Wilcoxon Rank Sum test. Statistical significance is determined using the Hochberg step-up method to adjust for multiple comparisons. In the Hochberg method, p values for each of the hypotheses are arranged in order from highest to lowest  $P_1 < P_2 < P_3 < P_4$ . In this analysis plan, the ‘hypothesis’ refers to the null hypothesis. Rejecting all four hypotheses indicates that all four primary hypotheses are correct and requires that  $p_4 \leq 0.05$ . If  $P_4$  is not  $< 0.05$ , then three hypotheses are rejected if  $P_3 < 0.05/2$ , two hypotheses are rejected if  $P_2 < 0.05/3$ , and one hypothesis is rejected if  $P_1 < 0.05/4$ . IQR = interquartile range. Hochberg adjusted p values can also be calculated as follows: adjusted  $P_4 = P_4$ , adjusted  $P_3 = \text{minimum of (adjusted } P_4, 2 \times \text{the value of } P_3)$ , adjusted  $P_2 = \text{minimum of the value of (adjusted } P_3, 3 \times \text{times } P_2)$ , and adjusted  $P_1 = \text{minimum of the value of (adjusted } P_2, 4 \times P_1)$ . An adjusted Hochberg P value is statistically significant if the adjusted Hochberg  $P < 0.05$ .

**eTable 2. Effects of GM-CSF and Exercise on Study Outcomes at 6-Month Follow-up**

|                                                         | <b>Exercise + GM-CSF</b>                           | <b>Attention control + GM-CSF</b>                | <b>Exercise + placebo</b>                          | <b>Attention control + placebo</b> |
|---------------------------------------------------------|----------------------------------------------------|--------------------------------------------------|----------------------------------------------------|------------------------------------|
| <b>Six-minute walk (meters)</b>                         |                                                    |                                                  |                                                    |                                    |
|                                                         | N=51                                               | N=52                                             | N=53                                               | N=51                               |
| Baseline Mean (SD)                                      | 334.1 (107.3)                                      | 342.9 (99.5)                                     | 338.7 (95.6)                                       | 339.1 (92.0)                       |
| 6-month follow-up Mean (SD)                             | 368.4 (103.4)                                      | 342.9 (109.9)                                    | 362.0 (91.7)                                       | 330.6 (97.7)                       |
| Within-group 6-month change Mean (95% CI)               | +34.3 (+16.3, +52.2)                               | +0.1 (-17.8, +18.0)                              | +23.2 (+5.3, +41.2)                                | -8.6 (-27.3, +10.1)                |
| 6-month change relative to attention control + GM-CSF*  | +34.2 (+8.7, +59.7)<br>P=0.009<br>Adjusted P=0.036 | ---                                              | ---                                                | ---                                |
| 6-month change relative to exercise + placebo*          | +11.0 (-14.1, +36.2)<br>P=0.39<br>Adjusted P=0.39  | ---                                              | ---                                                | ---                                |
| 6-month change relative to placebo + attention control* | ---                                                | +8.6 (-17.1, +34.4)<br>P=0.51<br>Adjusted P=0.51 | +31.8 (+6.2, +57.4)<br>P=0.015<br>Adjusted P=0.045 | ---                                |
| <b>Maximal treadmill walking time (minutes)</b>         |                                                    |                                                  |                                                    |                                    |
| Baseline Mean (SD)                                      | 7.8 (5.3)                                          | 8.9 (4.8)                                        | 6.5 (4.5)                                          | 6.9 (3.4)                          |
| 6-month follow-up Mean (SD)                             | 12.0 (6.1)                                         | 9.6 (4.8)                                        | 11.0 (5.1)                                         | 7.4 (3.9)                          |
| Within-group 6-month change Mean (95% CI)               | +4.2 (+3.1, +5.3)                                  | 0.7 (-0.4, +1.8)                                 | +4.5 (+3.4, +5.6)                                  | +0.5 (-0.6, +1.7)                  |
| 6-month change relative to attention control + GM-CSF*  | +3.5 (+2.0, +5.0)<br>P<0.001<br>Adjusted P<0.001   | ---                                              | ---                                                | ---                                |
| 6-month change relative to exercise + placebo*          | -0.3 (-1.8, +1.2)<br>P=0.70<br>Adjusted P=0.81     | ---                                              | ---                                                | ---                                |
| 6-month change relative to placebo + attention control* | ---                                                | +0.2 (-1.4, +1.7)<br>P=0.81<br>Adjusted P=0.81   | +4.0 (+2.4, +5.6)<br>P<0.001<br>Adjusted P<0.001   | ---                                |

**eTable 2 (continued). Effects of GM-CSF and Exercise on Study Outcomes at 6-Month Follow-up**

|                                                          | <b>Exercise + GM-CSF</b>                          | <b>Attention control + GM-CSF</b>                 | <b>Exercise + placebo</b>                         | <b>Attention control + placebo</b> |
|----------------------------------------------------------|---------------------------------------------------|---------------------------------------------------|---------------------------------------------------|------------------------------------|
| <b>Brachial Artery Flow-Mediated Dilation (%)</b>        |                                                   |                                                   |                                                   |                                    |
|                                                          | N=51                                              | N=52                                              | N=53                                              | N=51                               |
| Baseline Median (IQR)                                    | 4.95 (2.71, 7.62)                                 | 5.61 (4.43, 7.13)                                 | 5.06 (2.98, 7.81)                                 | 5.40 (2.67, 7.29)                  |
| 6-month follow-up Median (IQR)                           | 4.91 (2.18, 7.91)                                 | 5.49 (3.89, 7.54)                                 | 5.33 (2.58, 7.15)                                 | 4.10 (2.30, 7.17)                  |
| Within-group 6-month change Median (IQR)                 | -0.29 (-1.57, +1.81)                              | -0.27 (-1.73, +1.15)                              | -0.36 (-1.75, +1.33)                              | -0.65 (-2.73, +1.48)               |
| 6-month change relative to attention control + GM-CSF**  | +0.21 (-0.70, +1.13)<br>P=0.65<br>Adjusted P=0.71 | ---                                               | ---                                               | ---                                |
| 6-month change relative to exercise + placebo**          | +0.19 (-0.83, +1.21)<br>P=0.71<br>Adjusted P=0.71 | ---                                               | ---                                               | ---                                |
| 6-month change relative to placebo + attention control** | ---                                               | +0.36 (-0.76, +1.48)<br>P=0.53<br>Adjusted P=0.71 | +0.41 (-0.80, +1.61)<br>P=0.51<br>Adjusted P=0.71 | ---                                |

\*Difference in Changes (95% CI). The P value is from the two-sample t-test. \*\* Hodges-Lehmann estimation of location shift (95% confidence limits), P value from Wilcoxon Rank Sum test. Statistical significance is determined using the Hochberg step-up method to adjust for multiple comparisons. In the Hochberg method, p values for each of the hypotheses are arranged in order from highest to lowest  $P_1 < P_2 < P_3 < P_4$ . In this analysis plan, the ‘hypothesis’ refers to the null hypothesis. Rejecting all four hypotheses indicates that all four primary hypotheses are correct and requires that  $p_4 \leq 0.05$ . If  $P_4$  is not  $< 0.05$ , then three hypotheses are rejected if  $P_3 < 0.05/2$ , two hypotheses are rejected if  $P_2 < 0.05/3$ , and one hypothesis is rejected if  $P_1 < 0.05/4$ . IQR = interquartile range. Hochberg adjusted p values can also be calculated as follows: adjusted  $P_4 = P_4$ , adjusted  $P_3 = \text{minimum of (adjusted } P_4, 2 \times \text{the value of } P_3)$ , adjusted  $P_2 = \text{minimum of the value of (adjusted } P_3, 3 \times \text{times } P_2)$ , and adjusted  $P_1 = \text{minimum of the value of (adjusted } P_2, 4 \times P_1)$ . An adjusted Hochberg P value is statistically significant if the adjusted Hochberg  $P < 0.05$ .

**eTable 3. Effect of GM-CSF and Exercise on Changes in Reactive Hyperemia Flow, Reactive Hyperemic Average Peak Velocity, and Brachial Artery Diameter at 12-Week Follow-up**

**eTable 3a. Changes in reactive hyperemia brachial flow in response to study interventions**

|                                                                   | <b>Exercise + GM-CSF</b>            | <b>Attention control + GM-CSF</b>  | <b>Exercise + placebo</b>           | <b>Attention control + placebo</b>  |
|-------------------------------------------------------------------|-------------------------------------|------------------------------------|-------------------------------------|-------------------------------------|
| <b>Reactive hyperemia brachial flow (cubic centimeter/minute)</b> |                                     |                                    |                                     |                                     |
|                                                                   | N=48                                | N=47                               | N=47                                | N=43                                |
| Baseline Mean (SD)                                                | 912.93 (384.75)                     | 960.52 (312.38)                    | 863.55 (370.70)                     | 883.62 (301.03)                     |
| 12-week follow-up Mean (SD)                                       | 942.52 (403.01)                     | 957.96 (283.39)                    | 838.05 (353.49)                     | 864.12 (300.31)                     |
| Within-group 12-week change Mean (95% CI)                         | +29.59 (-29.74, +88.94)<br>P=0.3208 | -2.56 (-72.30, +67.18)<br>P=0.9413 | -25.50 (-93.88, +42.89)<br>P=0.4568 | -19.49 (-83.67, +44.69)<br>P=0.5433 |

**eTable 3 (continued). Effect of GM-CSF and Exercise on Changes in Reactive Hyperemia Flow, Reactive Hyperemic Average Peak Velocity, and Brachial Artery Diameter at 12-Week Follow-up**

**eTable 3b. Changes in reactive hyperemic average peak velocity in response to study interventions**

|                                                                     | <b>Exercise + GM-CSF</b>          | <b>Attention control + GM-CSF</b> | <b>Exercise + placebo</b>         | <b>Attention control + placebo</b> |
|---------------------------------------------------------------------|-----------------------------------|-----------------------------------|-----------------------------------|------------------------------------|
| <b>Reactive hyperemia average peak velocity (centimeter/second)</b> |                                   |                                   |                                   |                                    |
|                                                                     | N=48                              | N=47                              | N=47                              | N=43                               |
| Baseline Mean (SD)                                                  | 169.73 (38.35)                    | 165.06 (32.44)                    | 161.57 (33.91)                    | 163.56 (29.79)                     |
| 12-week follow-up Mean (SD)                                         | 173.76 (41.17)                    | 163.47 (24.50)                    | 159.22 (30.08)                    | 163.75 (30.89)                     |
| Within-group 12-week change Mean (95% CI)                           | +4.03 (-4.42, +23.48)<br>P=0.3422 | -1.60 (-10.99, +7.80)<br>P=0.7341 | -2.35 (-10.78, +6.07)<br>P=0.5766 | +0.20 (-7.80, +8.19)<br>P=0.9606   |

**eTable 3 (continued). Effect of GM-CSF and Exercise on Changes in Reactive Hyperemia Flow, Reactive Hyperemic Average Peak Velocity, and Brachial Artery Diameter at 12-Week Follow-up**

**eTable 3c. Changes in brachial artery diameter in response to study interventions**

|                                           | <b>Exercise + GM-CSF</b>         | <b>Attention control + GM-CSF</b> | <b>Exercise + placebo</b>        | <b>Attention control + placebo</b> |
|-------------------------------------------|----------------------------------|-----------------------------------|----------------------------------|------------------------------------|
| <b>Resting BA diameter (mm)</b>           |                                  |                                   |                                  |                                    |
|                                           | N=48                             | N=47                              | N=47                             | N=43                               |
| Baseline Mean (SD)                        | 4.39 (0.67)                      | 4.54 (0.65)                       | 4.33 (0.84)                      | 4.37 (0.73)                        |
| 12-week follow-up Mean (SD)               | 4.43 (0.68)                      | 4.53 (0.70)                       | 4.35 (0.86)                      | 4.38 (0.70)                        |
| Within-group 12-week change Mean (95% CI) | +0.04 (-0.02, +0.09)<br>P=0.1746 | -0.01 (-0.07, +0.05)<br>P=0.7247  | +0.02 (-0.04, +0.09)<br>P=0.4985 | +0.01 (-0.05, +0.06)<br>P=0.8476   |

GM-CSF = Granulocyte macrophage colony stimulating factor



**eTable 4. Results of Generalized Linear Mixed Models for Effect of GM-CSF and Exercise on Study Outcomes (Longitudinal Analyses) \***

|                                                     | <b>Exercise + GM-CSF</b>                            | <b>Attention control + GM-CSF</b>                   | <b>Exercise + placebo</b>                           | <b>Attention control + placebo</b> |
|-----------------------------------------------------|-----------------------------------------------------|-----------------------------------------------------|-----------------------------------------------------|------------------------------------|
| <b>Six-minute walk (meters)</b>                     |                                                     |                                                     |                                                     |                                    |
|                                                     | N=51                                                | N=53                                                | N=53                                                | N=51                               |
| Relative to attention control + GM-CSF              | +25.9 (+4.3, +47.6)<br>P=0.019<br>Adjusted P=0.057  | ---                                                 | ---                                                 | ---                                |
| Relative to exercise + placebo                      | +3.1 (-18.4, +24.7)<br>P=0.775<br>Adjusted P=0.775  | ---                                                 | ---                                                 | ---                                |
| Relative to placebo + attention control             | ---                                                 | +2.7 (-15.6, +21.0)<br>P=0.772<br>Adjusted P=0.775  | +25.5 (+7.3, +43.8)<br>P=0.006<br>Adjusted P=0.024  | ---                                |
| <b>Maximal treadmill walking time (minutes)</b>     |                                                     |                                                     |                                                     |                                    |
|                                                     | N=51                                                | N=53                                                | N=53                                                | N=51                               |
| Relative to attention control + GM-CSF              | +3.1 (+1.7, +4.5)<br>P<0.001<br>Adjusted P<0.001    | ---                                                 | ---                                                 | ---                                |
| Relative to exercise + placebo                      | -0.6 (-2.1, +0.9)<br>P=0.431<br>Adjusted P=0.601    | ---                                                 | ---                                                 | ---                                |
| Relative to placebo + attention control             | ---                                                 | -0.3 (-1.4, +0.8)<br>P=0.601<br>Adjusted P=0.601    | +3.4 (+2.3, +4.6)<br>P<0.001<br>Adjusted P<0.001    | ---                                |
| <b>Brachial Artery Flow-Mediated Dilatation (%)</b> |                                                     |                                                     |                                                     |                                    |
|                                                     | N=51                                                | N=53                                                | N=53                                                | N=51                               |
| Relative to attention control + GM-CSF              | +0.05 (-0.85, +0.95)<br>P=0.918<br>Adjusted P=0.918 | ---                                                 | ---                                                 | ---                                |
| Relative to exercise + placebo                      | +0.20 (-0.80, +1.20)<br>P=0.696<br>Adjusted P=0.918 | ---                                                 | ---                                                 | ---                                |
| Relative to placebo + attention control             | ---                                                 | +0.31 (-0.48, +1.10)<br>P=0.440<br>Adjusted P=0.918 | +0.16 (-0.74, +1.06)<br>P=0.726<br>Adjusted P=0.918 | ---                                |

\*Statistical significance is determined using the Hochberg step-up method to adjust for multiple comparisons. In the Hochberg method, p values for each of the hypotheses are arranged in order from highest to lowest  $P_1 < P_2 < P_3 < P_4$ . In this analysis plan, the 'hypothesis' refers to the null hypothesis. Rejecting all four hypotheses indicates that all four primary hypotheses are correct and requires that  $p_4 \leq 0.05$ . If  $P_4$  is not  $< 0.05$ , then three hypotheses are rejected if  $P_3 < 0.05/2$ , two hypotheses are rejected if  $P_2 < 0.05/3$ , and one hypothesis is rejected if  $P_1 < 0.05/4$ . IQR = interquartile range. Hochberg adjusted p values can also be calculated as follows: adjusted  $P_4 = P_4$ , adjusted  $P_3 = \text{minimum of (adjusted } P_4, 2 \times \text{the value of } P_3)$ , adjusted  $P_2 = \text{minimum of the value of (adjusted } P_3, 3 \text{ times } P_2)$ , and adjusted  $P_1 = \text{minimum of the value of (adjusted } P_2, 4 \times P_1)$ . An adjusted Hochberg P value is statistically significant if the adjusted Hochberg  $P < 0.05$ .

### **eMethods. Detailed Methods for Measurement of Progenitor Cells**

Blood from peripheral venipuncture was washed to lyse red blood cells. Remaining cell counts were obtained using the Countess<sup>®</sup> Automated Cell Counter (Life Technologies, NY). White cells were stained with LIVE/DEAD<sup>®</sup> Fixable Dead Cell Stains (Life Technologies, NY), preincubated with human Fc block (Miltenyi Biotec), and stained with antibodies: anti-CD34 VioBlue (Miltenyi, CA), anti-CD133-APC (Miltenyi, CA), anti-CD45 AlexaFluor 700 (BD biosciences, CA), and anti-CD31 (PECAM-1) APC-eFluor<sup>®</sup> 780 (Ebiosciences, CA) antibodies (11). Stained samples were acquired on a BD LSRII Flow Cytometer (BD Biosciences, CA) and analyzed using Flowjo software (Treestar, OR). Dead cells were excluded. Cell populations were gated and analyzed based on an anti-CD133-APC FMO control.

**Supplementary Figure 1. Temporal changes in endothelial progenitor cells according to study group assignment with error bars**

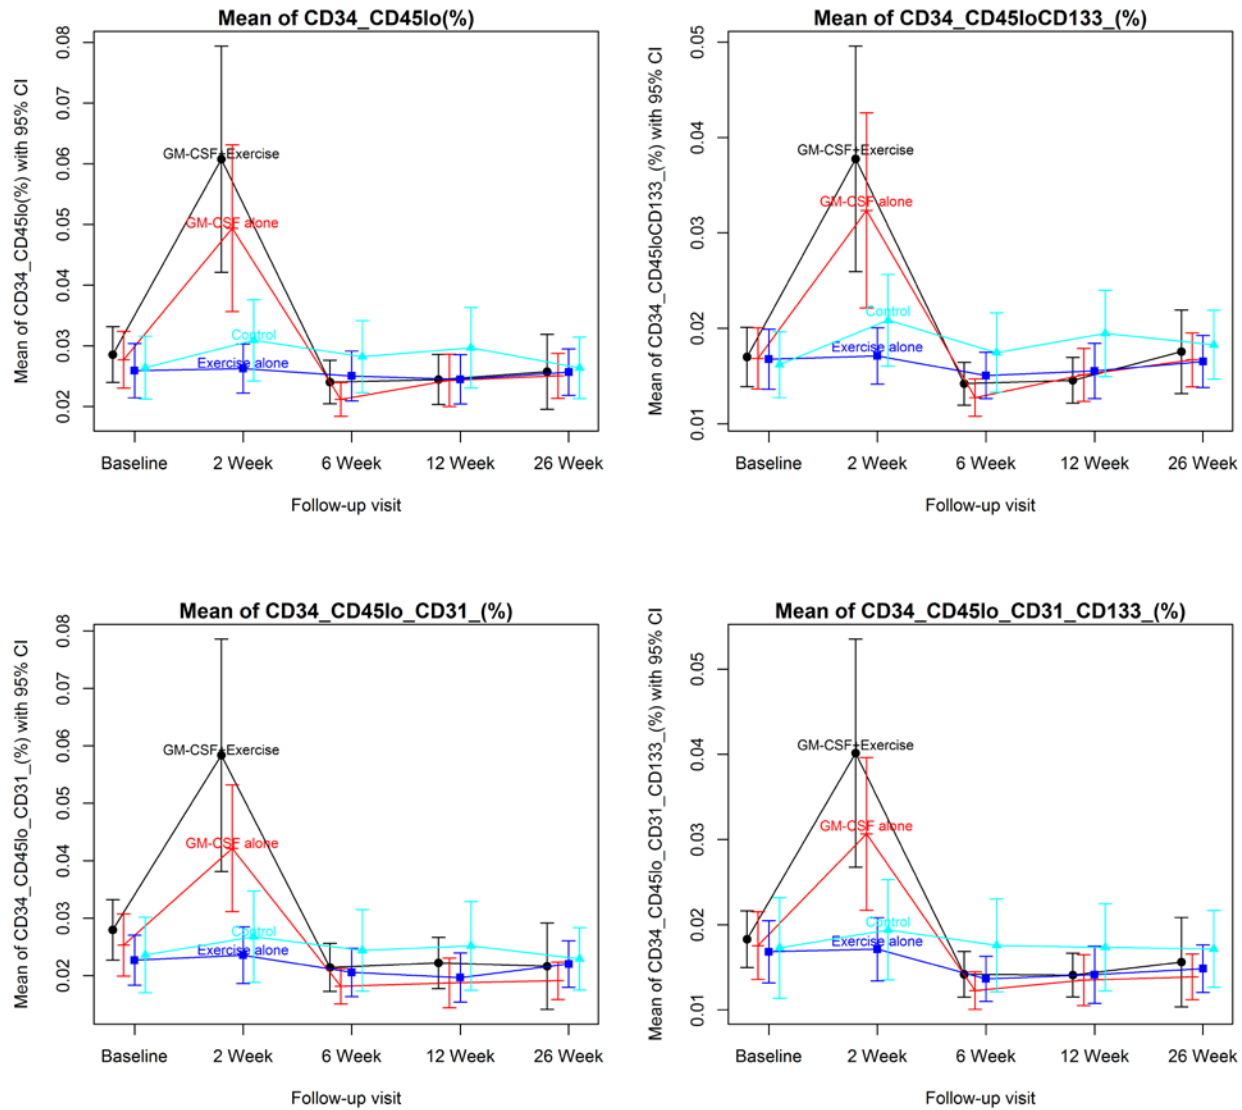

**Supplementary Figure 2. Temporal changes in endothelial progenitor cells according to study group assignment without error bars**

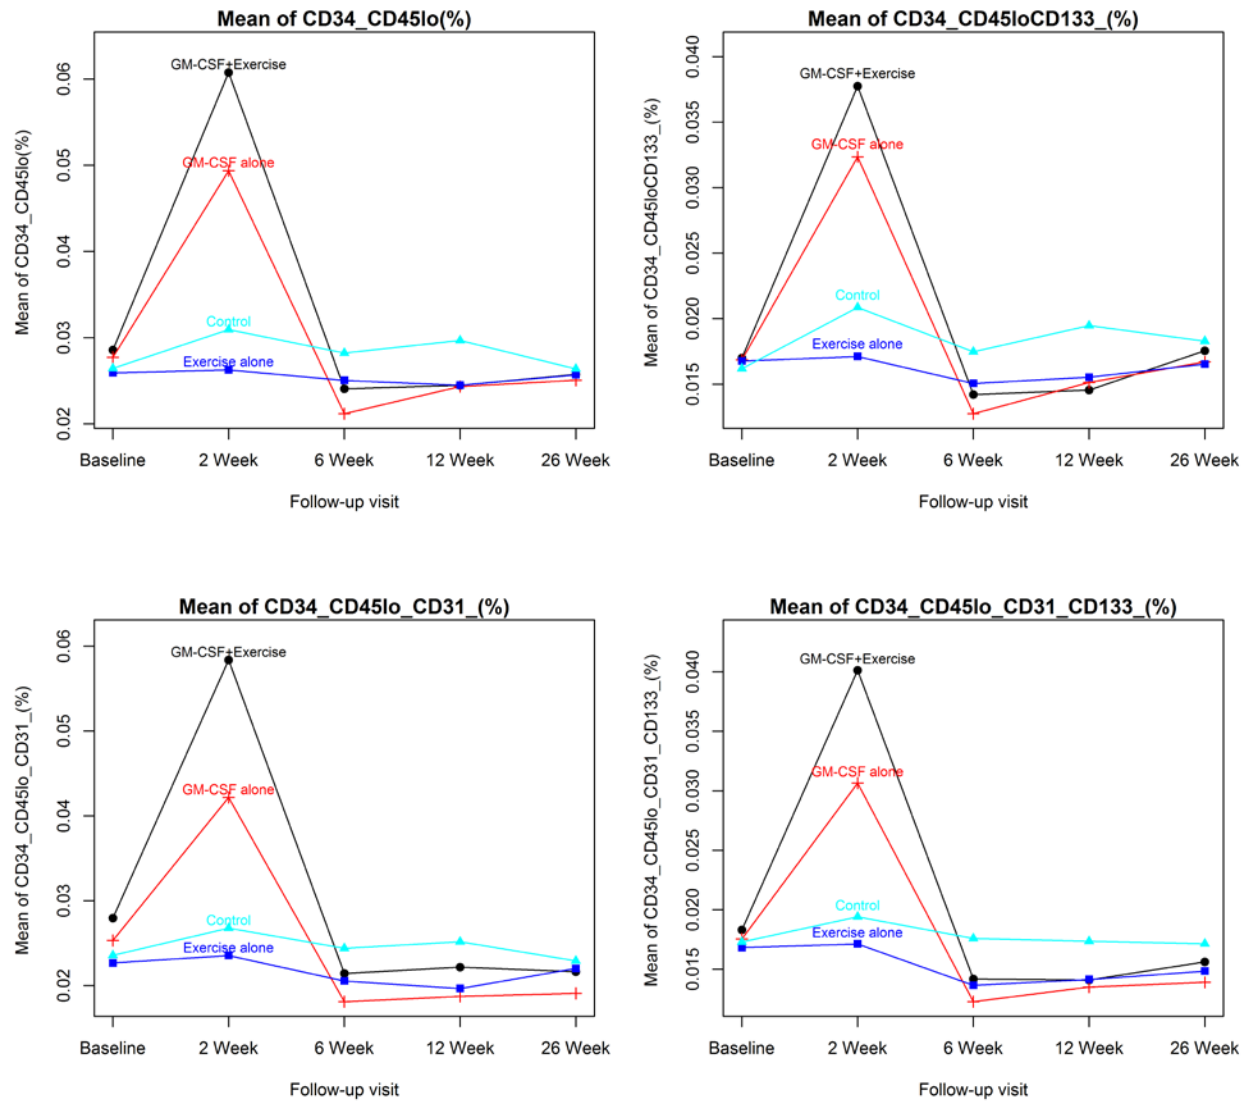

**eFigure 3.** Changes in Treadmill Walking Time by Study Intervention (N=208)

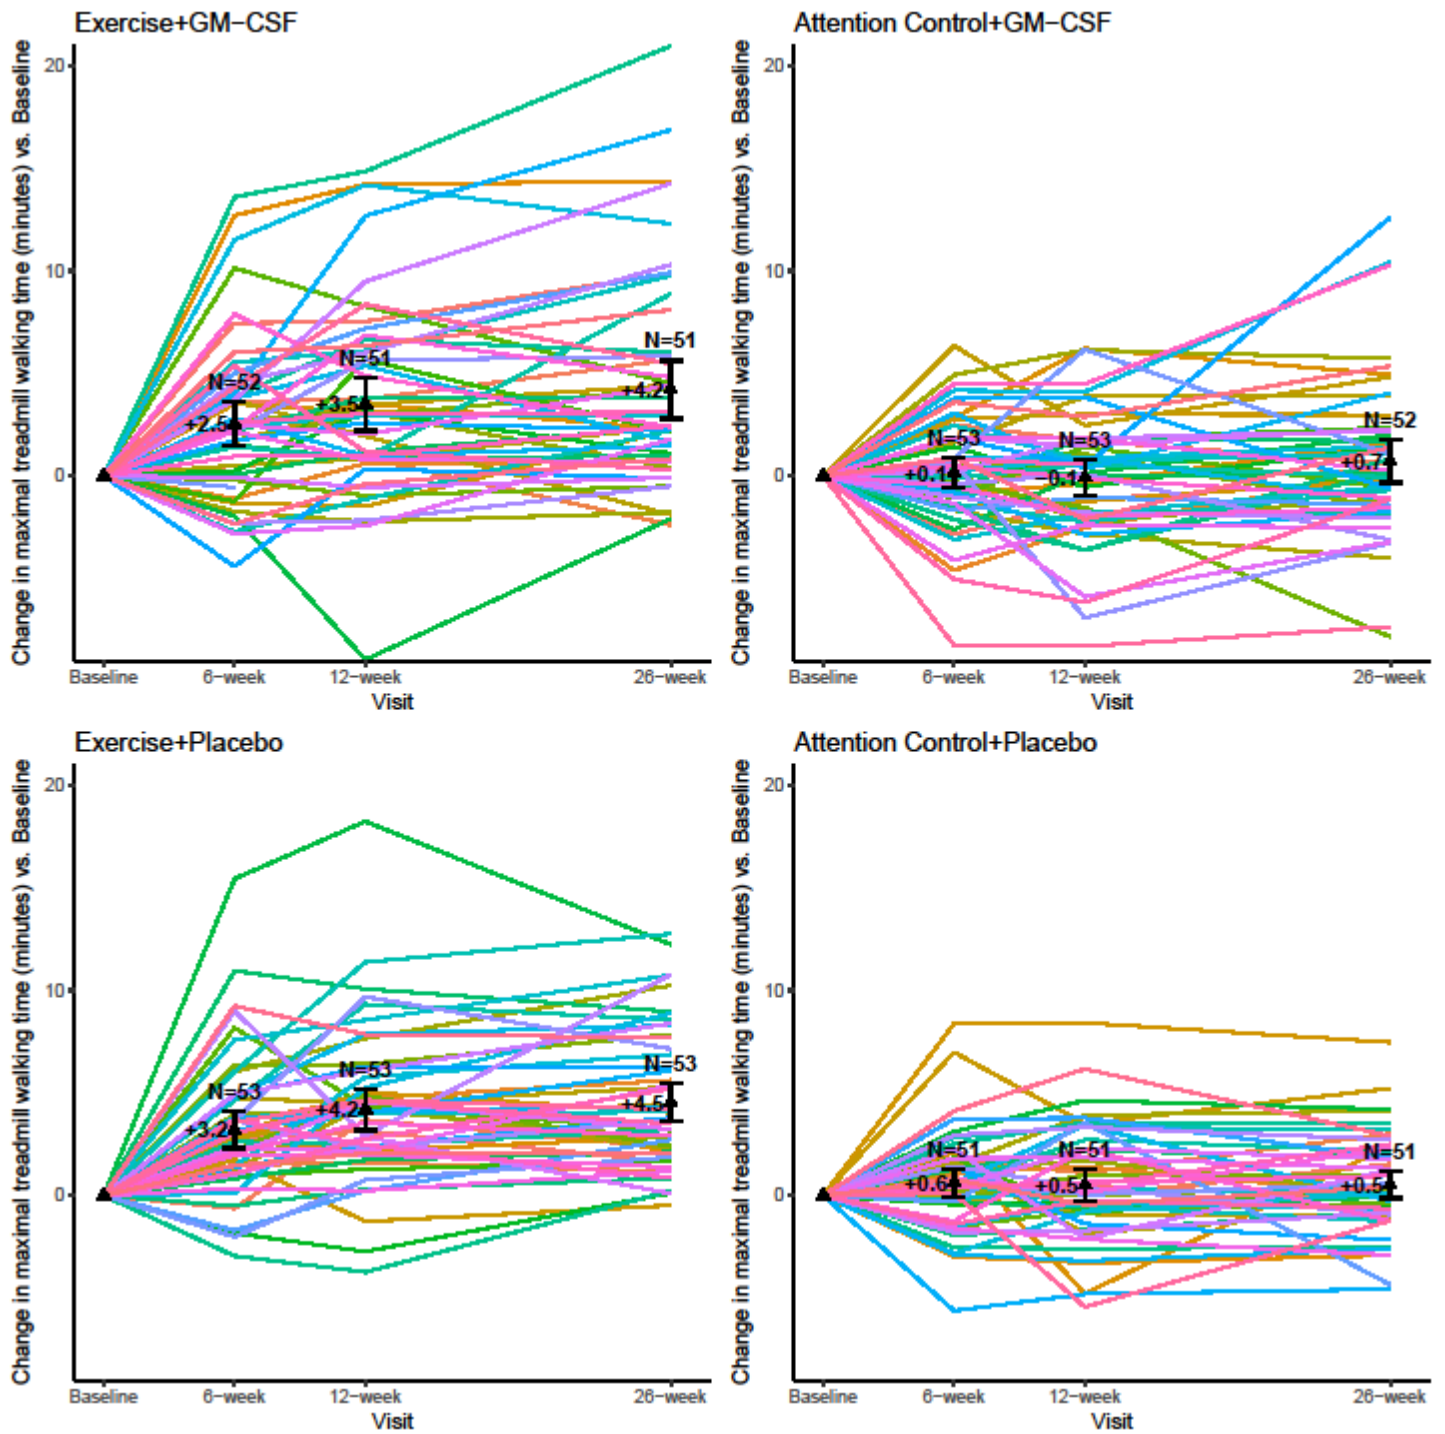

**eFigure 4.** Changes in Brachial Artery Flow-Mediated Dilatation by Study Intervention (N=208)

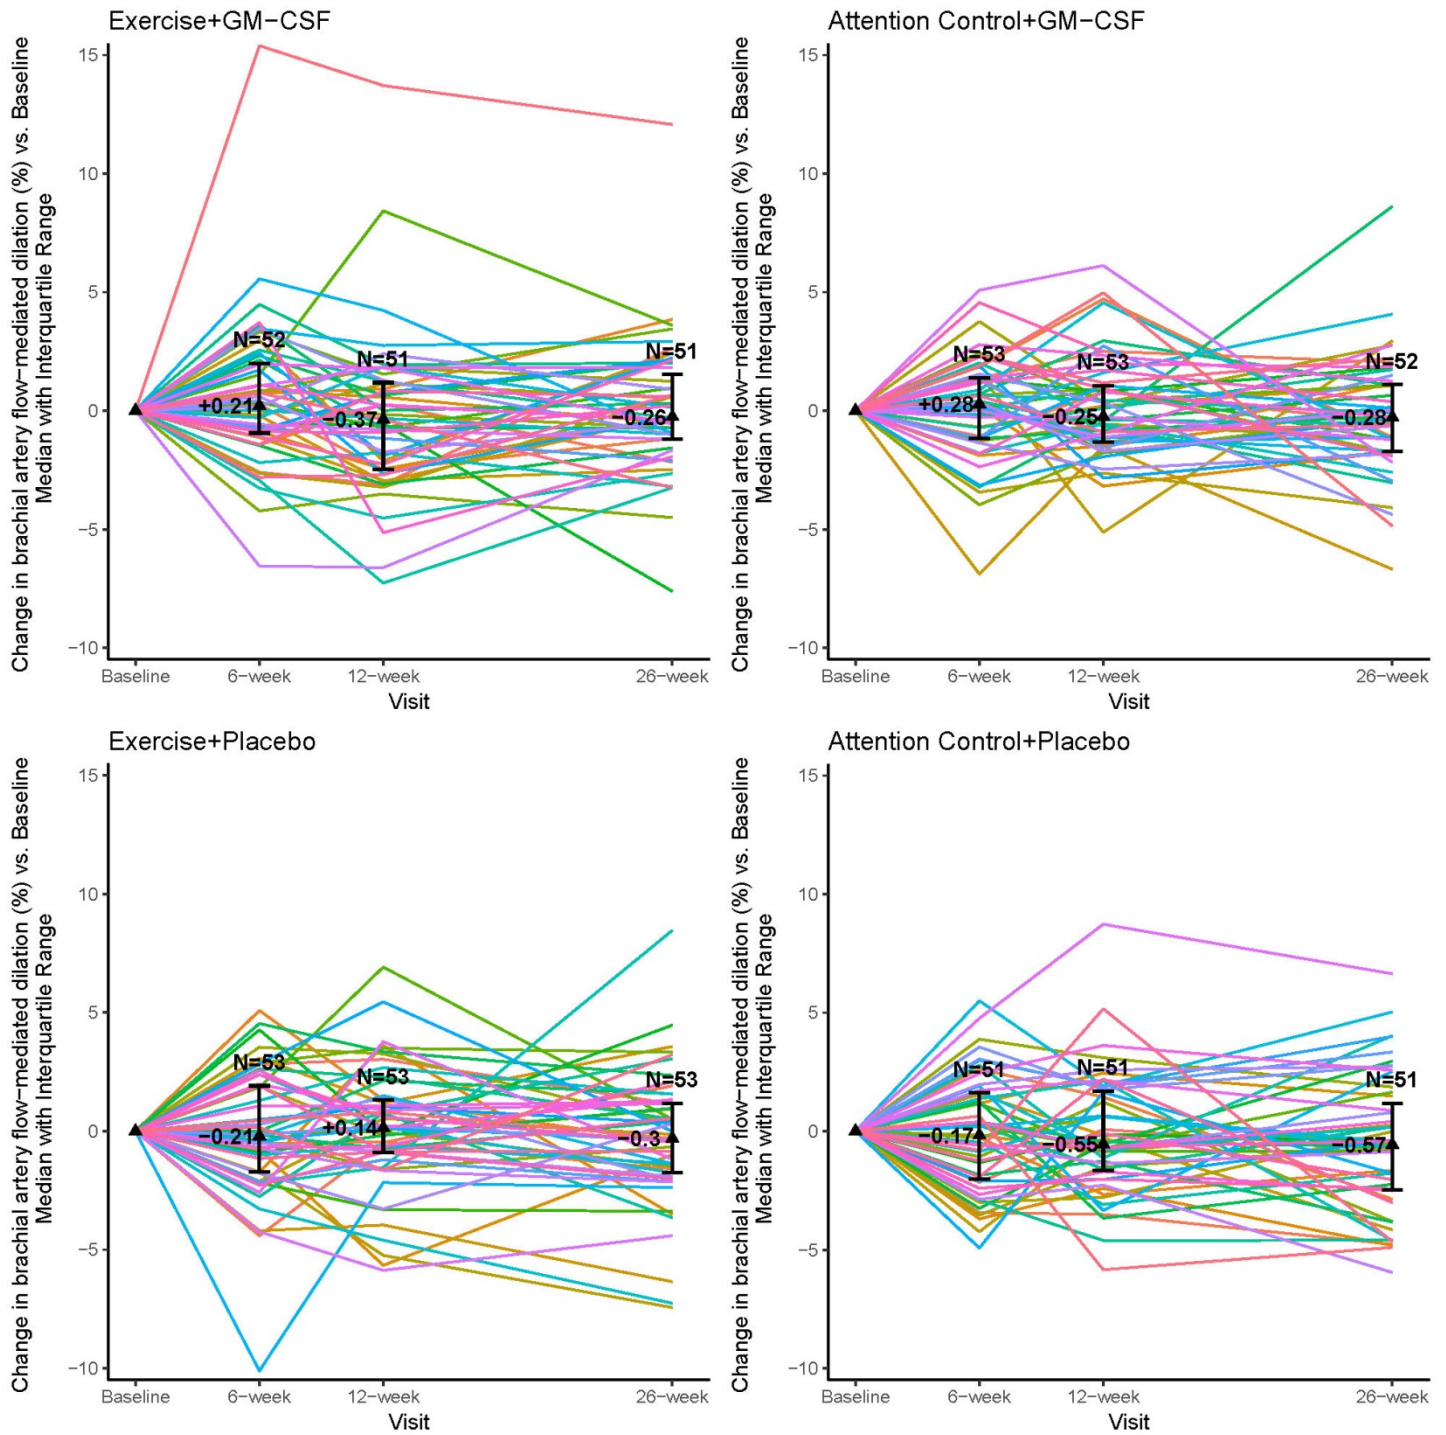

Supplement: jama-318-2089-s002.pdf [file jama-318-2089-s002.pdf]
