# Supplementary material
Source: PubMed Central journal article supplement (PMC5820720)
Supplement: jama-318-2089-s001.pdf [file jama-318-2089-s001.pdf]

## **Supplemental Online Content 1**

McDermott MM, Ferrucci L, Tian L, et al. Effect of granulocyte-macrophage colony-stimulating factor with or without supervised exercise on walking performance in patients with peripheral artery disease. *JAMA*. doi: 10.1001/jama.2017.17437

### **Study Protocol and Statistical Analysis Plan**

1                   **PROgenitor cell release Plus Exercise to improve functional performance in PAD:**  
 2                                           **The PROPEL Study**  
 3                                           **Principal Investigator: Mary McDermott, MD**

4  
 5                                           **SPECIFIC AIMS**

6 Preliminary evidence suggests that increasing circulating levels of CD34+ cells with granulocyte monocyte  
 7 colony stimulating factor (GM-CSF) or other therapies may improve walking performance in patients with lower  
 8 extremity peripheral arterial disease (PAD) (1,2). However, results of small clinical trials are mixed (1-4). The  
 9 association of GM-CSF with improved walking performance in PAD is not definitively established. Preliminary  
 10 data also suggest that lower extremity ischemia, induced during walking exercise, may increase circulating  
 11 CD34+ cell levels, enhance homing of CD34+ cells to ischemic sites, and **augment** the ability of GM-CSF to  
 12 improve walking performance in PAD (1,2). We propose a randomized controlled clinical trial (2 x 2 factorial  
 13 design) of 240 participants with PAD randomized to one of four arms: Group A: GM-CSF + supervised  
 14 exercise therapy; Group B: GM-CSF therapy + an attention control group; Group C: placebo + supervised  
 15 exercise therapy; and Group D: placebo + attention control group. Our primary outcome is change in six-  
 16 minute walk performance between baseline and 12-week follow-up. From this point forward, "GM-CSF  
 17 combined with supervised treadmill exercise" refers to Group A; "GM-CSF therapy alone" refers to Group B,  
 18 "supervised exercise therapy alone" refers to Group C, and no active therapy refers to Group D.

19  
 20 **Primary Specific Aim.**

- 21 1. We will determine whether GM-CSF combined with supervised treadmill exercise (Group A) achieves  
 22 greater improvement in six-minute walk performance at 12-week follow-up, compared to GM-CSF alone  
 23 (Group B) and supervised exercise alone (Group C), respectively. *We hypothesize that PAD participants*  
 24 *randomized to Group A will achieve greater improvement in six-minute walk performance at 12-week follow-up,*  
 25 *compared to those randomized to Group B and those randomized to Group C, respectively.*  
 26 2. We will determine whether GM-CSF therapy alone (Group B) significantly improves six-minute walk  
 27 performance at 12-week follow-up, compared to Group D. *We hypothesize that PAD participants randomized*  
 28 *to Group B will achieve greater improvement in the six-minute walk at 12-week follow-up than Group D.*  
 29 3. We will confirm that supervised treadmill exercise therapy alone (Group C) significantly increases six-  
 30 minute walk performance at 12-week follow-up, compared to Group D. *We hypothesize that PAD participants*  
 31 *randomized to Group C will achieve greater improvement in six-minute walk performance at 12-week follow-up,*  
 32 *compared to those randomized to Group D.*

33  
 34 **Secondary Specific Aim.**

- 35 1. We will determine whether GM-CSF combined with supervised exercise (Group A) is associated with  
 36 greater increases in brachial artery flow-mediated dilation (FMD) and maximal treadmill walking time at 12-  
 37 week follow-up, compared to GM-CSF alone (Group B) and supervised exercise alone (Group C), respectively.  
 38 2. We will determine whether GM-CSF alone (Group B) is associated with significantly greater increases in  
 39 brachial artery FMD and maximal treadmill walking time at 12-week follow-up, compared to Group D.  
 40 3. We will determine whether a supervised treadmill exercise intervention alone (Group C) is associated with  
 41 greater increases in CD34+ cells at 12-week follow-up, compared to Group D.  
 42 4. We will confirm prior data demonstrating that supervised treadmill exercise alone (Group C) is associated  
 43 with greater increases in brachial artery FMD and maximal treadmill walking time, compared to Group D.  
 44

45 In our Exploratory Aim, we will establish the temporal trajectory of favorable changes in study outcomes in  
 46 response to GM-CSF. "Study outcomes" refers to six-minute walk performance, maximal treadmill walking  
 47 time, and brachial artery FMD. We will also establish the temporal trajectory of increases in progenitor cells in  
 48 response to supervised treadmill exercise. We will determine whether the degree of increase in progenitor  
 49 cells is associated with the degree of improvement in study outcomes.

50  
 51 **Exploratory Specific Aims.**

- 52 1. We will determine whether GM-CSF combined with supervised treadmill exercise therapy (Group A) is  
 53 associated with greater increases in study outcomes at six-week follow-up and at six-month follow-up,  
 54 compared to GM-CSF therapy alone (Group B) and supervised exercise therapy alone (Group C), respectively.

- 55 2. We will determine whether GM-CSF alone (Group B) is associated with greater increases in study  
 56 outcomes at six-week follow-up and at six-month follow-up, respectively, compared to Group D.
- 57 3. We will determine whether supervised exercise therapy alone (Group C) is associated with significantly  
 58 greater increases in CD34+ cells and other progenitor cell measures at two-week follow-up, six-week follow-up  
 59 and at six-month follow-up, compared to Group D.
- 60 4. Among participants receiving GM-CSF, we will determine whether the degree of increase in progenitor cell  
 61 measures at two-week follow-up is associated with the degree of improvement in remaining study outcomes at  
 62 six-week, 12-week, and six-month follow-up, respectively.
- 63 5. Among up to 30 participants with PAD and 15 consenting participants who are determined not to have PAD,  
 64 we will determine whether progenitor cell measures increase acutely after a treadmill exercise stress test  
 65 among participants with PAD and among those without PAD, respectively. We will further determine whether  
 66 greater increases in progenitor cell measures after a treadmill exercise stress test are associated with better  
 67 six-minute walk performance and higher ABI values at baseline, compared to lesser increases in progenitor  
 68 cell measures after a treadmill exercise stress test.
- 69 6. Study participants will have the option of participating in a sub study that consists of a muscle biopsy of the  
 70 medial head of the gastrocnemius muscle. The muscle biopsy will be performed by Dr. Robert Sufit, a board  
 71 certified neurologist with more than 20 years of experience performing lower extremity muscle biopsies. The  
 72 muscle biopsy will be performed in a clinical examination room using an open biopsy technique. A  
 73 subcutaneous injection of lidocaine will be administered. For the lower extremity biopsy, an incision will be  
 74 made in the lower extremity muscle (medial head of the gastrocnemius muscle and approximately 250 mgs of  
 75 muscle tissue will be removed. Most or all of the sample will be frozen immediately in liquid nitrogen and  
 76 stored at -80 degrees Celsius. Participants will be asked to return for a follow-up visit to check the site of the  
 77 muscle biopsy approximately one week after the procedure. Participants may be asked to undergo a muscle  
 78 biopsy at baseline and after 26-week follow-up. Thus, the total number of muscle biopsies a participant may  
 79 be asked to have is two (one lower extremity biopsy at baseline and one at six-month follow-up). We may take  
 80 photographs of the biopsy site and biopsy tissue before, during, and after the procedure. We may take  
 81 photographs at the post-biopsy incision check-up as well to show the scar and healing. These images will not  
 82 show any identifying information such as name or date of birth. These images may be used for grant  
 83 proposals, manuscripts, or other research related activities. Muscle specimens will be sent to the Universities  
 84 of Florida and Kentucky for analyses that include inflammatory biomarkers, markers of oxidative stress,  
 85 measures of mitochondrial function and quantity, and muscle myofiber typing. Analyses may also be tested for  
 86 protein measures of mitochondrial function, macrophages, satellite cells, and PCR/gene expression. Other  
 87 measures related to skeletal muscle quality and function may also be performed.

88  
 89 In addition, in a subset of participants we will obtain a muscle biopsy from the left and the right leg,  
 90 respectively. These bilateral biopsies could be obtained at baseline, at 26-week follow-up, or at both time  
 91 points. The second (contralateral) biopsy will be performed at least six days after the first biopsy. In some  
 92 cases, the second biopsy may take place when the participant returns for their incision site check after the first  
 93 biopsy. It will be necessary for these individuals to remain off of their anti-platelet therapy for 7 days before  
 94 each procedure (i.e. potentially for approximately 14 days continuously). Physician approval will be required.

## 95 **A. RESEARCH STRATEGY- SIGNIFICANCE**

96 **A1. Lower extremity peripheral arterial disease (PAD) is common and is associated with functional**  
 97 **impairment and functional decline.** PAD affects eight million men and women in the United States, and will  
 98 be increasingly prevalent as the U.S. population survives longer with chronic disease (5). Our work and that of  
 99 others demonstrates that men and women with PAD have greater functional impairment and more rapid  
 100 functional decline than those without PAD (6-10). The functional impairments documented in PAD are  
 101 associated with loss of independence, increased mortality, and poor quality of life (11-13).

102  
 103  
 104 **A2. Few medical therapies have been identified that improve functional impairment in PAD.** Only two  
 105 medications, pentoxifylline and cilostazol, are FDA-approved for treating PAD-associated walking impairment.  
 106 Of these, pentoxifylline is usually ineffective and benefits from cilostazol are modest (14-17). New therapies  
 107 are urgently needed to improve walking performance and prevent functional decline in patients with PAD.

108  
109 **A3. Interventions that increase circulating progenitor cells are among the most promising emerging**  
110 **therapies for patients with cardiovascular disease.** Progenitor cells normally exist in low concentrations in  
111 peripheral blood. Interventions, such as GM-CSF, promote release of progenitor cells from bone marrow,  
112 spleen, and other sources into the circulation (18-20). These circulating progenitor cells can differentiate into  
113 mature endothelial cells and form new blood vessels, termed neoangiogenesis (21-24). In 1997, Asahara and  
114 colleagues demonstrated that CD34+ progenitor cells isolated from human peripheral blood differentiate into  
115 mature endothelial cells in vitro (22). In a rabbit hind limb ischemia model, these isolated CD34+ cells  
116 migrated to sites of tissue ischemia and incorporated into developing blood vessels (22). This work  
117 established that circulating progenitor cells isolated from humans can differentiate into mature endothelial cells  
118 and promote new blood vessel development in vivo. Progenitor cells also repair endothelial-cell injury and are  
119 associated with improved endothelial function (21-30). Mobilizing EPC reserves may improve walking  
120 performance in patients with PAD by increasing calf muscle perfusion through angiogenesis and by improving  
121 endothelial function and cardiovascular health. However, whether interventions that increase circulating  
122 progenitor cell levels improve functional performance in patients with PAD is not established.

123  
124 **A4. Therapeutic potential of CD34+ progenitor cells.** The CD34+ cell marker clearly identifies functional  
125 progenitor cell populations that are released from bone marrow in response to tissue ischemia, differentiate  
126 into endothelial cells, and promote angiogenesis in vitro and in vivo (22,31,32). In addition to the work by  
127 Asahara and colleagues described in section A3 (22), Ishida and colleagues harvested CD34+ cells from  
128 peripheral blood and injected them into calf muscle of six patients with peripheral ischemia (five with  
129 thromboangiitis obliterans and one with critical limb ischemia). At six-week follow-up, participants experienced  
130 a 200% increase in treadmill walking distance (32). However, the sample size was small and did not include a  
131 control group. It is currently not established whether interventions that increase circulating levels of CD34+  
132 cells can improve functional performance in patients with PAD.

133  
134 **A5. Preliminary evidence suggests that GM-CSF may improve walking performance in people with PAD**  
135 **by increasing CD34+ cells.** Subcutaneous GM-CSF injections increase levels of circulating CD34+ cells by  
136 disrupting progenitor cell anchors in the bone marrow (33). In hind-limb ischemia animal models, increasing  
137 circulating levels of progenitor cells is associated with calf muscle capillary formation, improved calf muscle  
138 perfusion, and increased exercise capacity (22,31,32). However, three prior small clinical trials testing the  
139 ability of GM-CSF (or G-CSF) to improve walking performance in patients with PAD have shown mixed results  
140 (1,3,4). Of these three randomized controlled clinical trials (summarized in Table 1), one demonstrated  
141 improved maximal walking distance (1) and one demonstrated no change in treadmill walking performance in  
142 response to GM-CSF (3). While the third study demonstrated improved pain-free treadmill walking distance,  
143 the validity of this finding is questionable, since only four participants completed follow-up treadmill testing (4).  
144 Additional limitations of these studies follow. First, sample sizes were small. Second, generalizability of the  
145 findings to the typical patient with PAD is limited. Participants in the study by Arai and colleagues all had  
146 critical limb ischemia (4), those in the study by Van Royan and colleagues all had maximal walking distances <  
147 200 meters (3), and those in the study by Subramaniyam and colleagues all had intermittent claudication (1).  
148 Yet most PAD participants will never have critical limb ischemia, many can walk > 200 meters on the treadmill,  
149 and most do not have symptoms of intermittent claudication (6,8,34,35). Third, no study assessed whether  
150 episodes of lower extremity ischemia, induced during supervised treadmill exercise, increases responsiveness  
151 to GM-CSF. Fourth, temporal trends in walking outcomes in response to the intervention were not evaluated in  
152 any study. The length of time required to achieve maximal benefit from GM-CSF and the duration of any  
153 therapeutic benefit is unknown. In summary, whether GM-CSF (or G-CSF) improves treadmill walking  
154 performance, with or without supervised treadmill exercise, remains unknown. A definitive trial is needed.  
155  
156  
157  
158

159 **Table 1. Summary of Prior Small Clinical Trials Studying the Ability of G-CSF or GM-CSF Therapy to**  
160 **Improve Walking Performance in PAD**

| Study                         | Participants                                                                             | Intervention(s)                                                                                                             | Outcome Measure                                                                                  | Results                                                                                                                               | Study Limitations                                                                                                                           |
|-------------------------------|------------------------------------------------------------------------------------------|-----------------------------------------------------------------------------------------------------------------------------|--------------------------------------------------------------------------------------------------|---------------------------------------------------------------------------------------------------------------------------------------|---------------------------------------------------------------------------------------------------------------------------------------------|
| Van Royen N et al (2005) (3)  | 40 with PAD and intermittent claudication (IC) who walked < 200 meters on the treadmill. | GM-CSF vs. placebo injections over 14 days.                                                                                 | Maximal treadmill walking time at 12-week follow-up.                                             | No difference between the intervention vs. control group in increasing treadmill walking performance.                                 | 1. Small sample size. 2. Limited to PAD participants with IC and short maximal walking distance. 3. No supervised exercise therapy.         |
| Arai M et al (2006) (4)       | 39 participants with PAD and critical leg ischemia.                                      | G-CSF for 10 days (N=14) vs. bone marrow transplant and calf injection of mononuclear cells (N=13) vs. usual care (N=12).   | Treadmill pain-free walking time, ABI, and transcutaneous oxygen saturation at 4-week follow-up. | G-CSF and bone marrow transplant were each associated with greater improvement in each outcome compared to usual care.                | 1. Small sample size. 2. Limited to participants with critical limb ischemia. 3. Only 4 participants completed treadmill test at follow-up. |
| Subramaniyam et al (2009) (1) | 45 with PAD and intermittent claudication.                                               | GM-CSF (N=29) vs. placebo injections (N=16) three times weekly for two weeks. All participants were instructed to exercise. | CD34+ cells, brachial artery FMD, and walking performance at 12-week follow-up.                  | GM-CSF was associated with significant increases in CD34+ cells, brachial artery FMD, and treadmill performance, compared to placebo. | 1. Small sample size. 2. Participants exercised on their own. Exercise adherence was not measured and is known to be poor in PAD (36).      |

IC- Intermittent claudication. PAD- Peripheral arterial disease. ABI- Ankle brachial index. FMD-Flow mediated dilation.

**A6. Supervised treadmill exercise may increase responsiveness to GM-CSF therapy in PAD.** Treadmill exercise induces lower extremity tissue ischemia in patients with PAD. Experimental and animal research demonstrate that tissue ischemia and hypoxia promote release of progenitor cells from bone marrow and encourage homing of progenitor cells to ischemic sites (37-41). Homing of progenitor cells to ischemic sites is mediated by up-regulation of progenitor cell receptors in target tissues (i.e. calf muscle) and by up-regulation of tissue receptors on progenitor cells (37-43). Myocardial ischemia increases responsiveness to G-CSF in patients with coronary artery disease (40). Together, these data suggest that tissue ischemia, such as that induced during supervised treadmill exercise, may increase responsiveness to GM-CSF. However, whether GM-CSF combined with supervised treadmill exercise improves functional performance more than either GM-CSF alone or supervised treadmill exercise alone is unknown.

**A7. Supervised treadmill exercise may improve walking performance in patients with PAD by increasing circulating progenitor cell levels.** Our prior randomized controlled clinical trial (the Study to Improve Leg Circulation (SILC)) compared the ability of a supervised treadmill exercise intervention and a supervised lower extremity resistance training intervention, respectively, to improve functional performance and brachial artery flow-mediated dilation in 156 PAD participants, both with and without intermittent claudication symptoms (R01-HL073351) (44). The primary outcome measure was 6-month change in the distance achieved in the six-minute walk test. Results, summarized below, were published in JAMA (44).

**Table 2. Results of our SILC randomized controlled clinical trial of supervised exercise interventions in PAD participants with and without symptoms of intermittent claudication (R01-HL073351) (44).**

| Absolute change between baseline and six-month follow-up     | Treadmill Exercise (n=50) | Resistance Exercise (n=46) | Control group (n=47) |
|--------------------------------------------------------------|---------------------------|----------------------------|----------------------|
| 6 minute walk distance (meters)                              | <b>+21.28<sup>1</sup></b> | -2.60                      | -15.02               |
| Maximal treadmill walking time (minutes)                     | <b>+3.69<sup>1</sup></b>  | +2.41 <sup>2</sup>         | +0.51                |
| Brachial artery FMD 60 seconds after cuff release (percent). | <b>+0.70%<sup>3</sup></b> | +0.11%                     | -0.89%               |

<sup>1</sup>p<0.001 vs. control; <sup>2</sup>p=0.009 vs. control; <sup>3</sup>p=0.02 vs. control. FMD- flow mediated dilation.

As shown in Table 2, our SILC trial demonstrated that supervised treadmill exercise improves walking performance and brachial artery flow-mediated dilation (FMD) in PAD participants with and without intermittent

188 claudication (44). SILC was the **first** randomized controlled trial to demonstrate that supervised treadmill  
 189 exercise improves brachial artery FMD, a measure of endothelial function, in PAD (44). However, mechanisms  
 190 of the favorable associations shown in Table 2 are unknown. We hypothesize that supervised treadmill  
 191 exercise may improve outcomes by increasing circulating levels of CD34+ cells.

192  
 193 **A8. Preliminary evidence suggests that walking exercise may increase circulating CD34+ cell levels in**  
 194 **patients with PAD.** Patients with PAD experience calf muscle ischemia during supervised treadmill exercise.  
 195 Experimental and animal studies demonstrate that tissue ischemia promotes endogenous release of progenitor  
 196 cells and increases homing of the progenitor cells to sites of tissue ischemia (37-43). Several small,  
 197 uncontrolled, or non-randomized trials have demonstrated that exercise increases circulating progenitor cells  
 198 **in patients without PAD** (21,44-48). However, people with PAD have fewer circulating progenitor cells and  
 199 exercise at a lower intensity than people without PAD (49,50). Only one previous publication describes the  
 200 association of exercise training with changes in circulating progenitor cells among patients with PAD (2). This  
 201 publication reports results from two small randomized controlled trials. Study A included 18 patients with PAD  
 202 and intermittent claudication without history of lower extremity revascularization. Study B included 18 patients  
 203 with PAD and intermittent claudication with a history of lower extremity revascularization. Participants in Study  
 204 A and Study B were randomized to either unsupervised treadmill exercise or no exercise for four weeks. The  
 205 unsupervised treadmill walking was performed 30 times per week: ten times more frequently than the exercise  
 206 currently recommended in clinical practice guidelines for PAD (2,35). At four-week follow-up, PAD participants  
 207 randomized to exercise in Study A had significant increases in CD34+ cells, while PAD participants  
 208 randomized to exercise in Study B had no increases in CD34+ cells. Neither control group experienced  
 209 increases in CD34+ cells. This preliminary work demonstrates that unsupervised treadmill exercise may  
 210 increase CD34+ cells in patients with PAD. However, the walking exercise intervention was performed 10  
 211 times more frequently than the exercise frequency recommended by PAD clinical practice guidelines (35). It is  
 212 unknown whether supervised treadmill exercise, performed 3 times weekly, as recommended by current  
 213 clinical practice guidelines, increases CD34+ cells in patients with PAD.

## 214 215 216 **A9. Theoretical model for our proposed PROPEL Study.**

217 **Figure 1. Theoretical Model for Associations of Study Interventions with Improved Functional Performance in**  
 218 **Participants with Peripheral Arterial Disease**

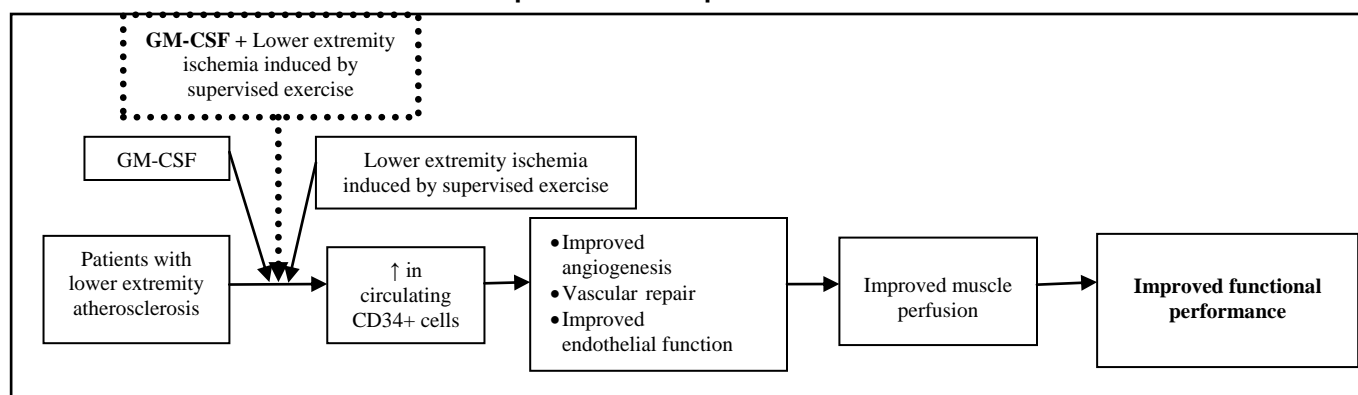

219  
 220  
 221  
 222 As described in Sections A3 and A4 above, experimental and animal data demonstrate that progenitor cells  
 223 released into the circulation can differentiate into endothelial cells, form new blood vessels (angiogenesis),  
 224 repair injured endothelium, and improve endothelial function (22-24). Preliminary data also suggest that tissue  
 225 ischemia, such as that induced by walking exercise in patients with PAD, may increase circulating progenitor  
 226 cells and promote their homing to sites of tissue ischemia (37-43). We hypothesize that GM-CSF combined  
 227 with supervised treadmill exercise maximizes circulating levels of CD34+ cells in patients with PAD and  
 228 improves calf muscle perfusion, by promoting neo-angiogenesis, improving endothelial function, and promoting  
 229 vascular repair. Figure 1 shows our proposed theoretical model for our study interventions.

## B. INNOVATION

**B1. Innovative features of the proposed PROPEL Study.** First, to our knowledge no prior studies have assessed whether the combination of GM-CSF and supervised treadmill exercise improves walking performance more than GM-CSF alone or supervised treadmill exercise alone in PAD. Yet, experimental and animal research demonstrate that tissue ischemia and hypoxia, such as that experienced by PAD patients during treadmill exercise, promote release of progenitor cells from bone marrow and encourage homing of progenitor cells to ischemic sites (37-43). Second, the time course of increases in progenitor cells in response to GM-CSF or supervised treadmill exercise among PAD participants is not defined. Although our primary outcome will be measured at 12-week follow-up, the PROPEL study will measure changes in CD34+ cells in response to study interventions at 2-week, 6-week, 12-week, and 6-month follow-up. Our results will help define the time-point of maximal improvement and the duration of improvement in study outcomes in response to study interventions and associated increases in progenitor cells. Third, to our knowledge no prior studies have directly assessed whether the degree of lower extremity ischemia achieved during treadmill exercise is associated with the degree of increase in circulating progenitor cells or the degree of improvement in study outcomes. We will measure lactate levels during treadmill exercise sessions to establish whether participants who achieve greater increases in lactate during exercise, indicating greater muscle ischemia, have greater increases in progenitor cells and greater improvement in study outcomes (see section C7).

**B2. Distinctive features of this trial as compared to prior work.** We are aware of one ongoing randomized clinical trial comparing the ability of GM-CSF vs. placebo to improve walking performance in patients with PAD (NCT number NCT0104141). Our proposal has many unique features as compared to this ongoing study. First, our proposal will test whether the combination of GM-CSF and supervised treadmill exercise is superior to GM-CSF alone and supervised treadmill exercise alone, respectively, for improving functional performance in PAD. Preliminary data support our hypothesis that GM-CSF may be most efficacious when delivered with supervised treadmill exercise, but this question is not being addressed by any study to our knowledge. Second, by measuring outcomes at six-weeks, 12-weeks, and six-month follow-up, our proposal will assess the temporal trajectory of favorable changes in response to GM-CSF with and without exercise therapy. Third, our proposal includes PAD participants both with and without classical intermittent claudication symptoms. This is important because most PAD patients do not have classic intermittent claudication symptoms. Asymptomatic PAD patients and PAD patients with atypical symptoms have significant functional impairment and faster functional decline than people without PAD (6,7,51). Fourth, whether supervised treadmill exercise, at the frequency and duration recommended by clinical practice guidelines (35), increases CD34+ cells in PAD participants is unknown. Our proposal will help establish whether increases in CD34+ cells mediate the favorable effects of supervised treadmill exercise in PAD. Fifth, we will use the six-minute walk test as our primary outcome measure. Our data and that of others demonstrate that the six-minute walk test is a better measure of community walking ability than treadmill testing in patients with PAD (see Section C12) (52-54).

**B3. Additional innovative features.** A unique feature of the proposed PROPEL study is the planned comparison in change in walking performance between two interventions that are each expected to increase circulating CD34+ cells. If supervised treadmill exercise and GM-CSF each increase circulating CD34+ cells, but only the groups receiving supervised treadmill exercise improve walking performance, this result will demonstrate that increasing circulating levels of CD34+ cells is not sufficient to improve walking performance in PAD. Additionally, if supervised exercise alone and GM-CSF alone each improve walking performance, but their combined benefit does not exceed either intervention alone, this finding would suggest a ceiling effect for the ability of interventions that increase CD34+ cells to improve walking performance in PAD. This proposed study is expected to identify biological pathways associated with improved functional performance in participants with PAD. In turn, this information is expected to lead to new therapies to help patients with PAD improve their functional performance and avoid decline. If our results demonstrate that increasing circulating levels of CD34+ cells is associated with improved walking performance, then future studies are expected to focus on methods that maximize circulating levels of CD34+ cells to improve walking performance in PAD.

## C. METHODS

**All data will be collected for research purposes only.**

**C1a. PRELIMINARY DATA.** Our multidisciplinary investigative team includes internationally recognized experts in PAD, progenitor cells, exercise training, endothelial function, and functional performance. Since 1998, our observational work on functional impairment and decline in PAD has been funded by six R01 awards from the National Heart Lung and Blood Institute (NHLBI), led by Dr. McDermott. Our prior work establishes that participants with PAD, both with and without classic symptoms of intermittent claudication, experience significant declines in walking performance over time (7,51,55). Even asymptomatic PAD participants have greater impairment in functional performance and faster rates of functional decline compared to those without PAD (7,51,55-57). Since 1998, our group has completed more than 75 original research articles on PAD. Three or more of these original research manuscripts have been published in JAMA, Annals of Internal Medicine, Circulation, Journal of the American College of Cardiology, and other widely circulated journals.

Our ability to successfully complete this proposed study is demonstrated in part by our recently completed randomized controlled trial of exercise in PAD participants both with and without intermittent claudication symptoms (the SILC trial, R01-HL073351) (44). SILC was the first study to test the ability of an exercise intervention to improve walking performance in PAD participants with and without intermittent claudication symptoms. SILC was also the first randomized controlled trial to test the ability of an exercise intervention to increase brachial artery FMD in PAD participants. Results were published in JAMA (44) and are described in section A7. **Mechanisms** by which supervised treadmill exercise improves outcomes in PAD are not established. The current proposal builds on our prior work. We will assess whether supervised treadmill exercise increases the ability of GM-CSF to improve walking performance in PAD, establish whether supervised treadmill exercise increases circulating CD34+ cells in participants with PAD, and determine whether the degree of increase in circulating CD34+ cells correlates with the degree of improvement in walking performance and brachial artery FMD in participants with PAD. Our proposed PROPEL study is expected to identify biological pathways associated with improved functional performance in participants with PAD.

**C1b. Test re-test reliability analysis of progenitor cell measures in our laboratory.** In preparation for our proposed PROPEL study, we assessed test re-test reliability of our progenitor cell measures. Progenitor cells were measured in 29 participants with and without PAD on two separate days, 1-2 weeks apart. Progenitor cells were measured in Dr. Douglas Losordo's laboratory at Northwestern. Table 3 shows our results.

**Table 3. Results of test re-test reliability analysis for progenitor cell measures in our laboratory (n=29)**

| Test                          | CD34+ | ALDH+ | CD34+/CD133+ |
|-------------------------------|-------|-------|--------------|
| Mean value (cells/ml)         | 635.3 | 812.0 | 509.4        |
| Intra-pair standard deviation | 72.8  | 75.2  | 60.7         |
| Technical Error (%)           | 11.46 | 9.26  | 11.91        |

Table 3 results demonstrate excellent test re-test reliability of progenitor cell measures in our laboratory.

**C1c. Associations of progenitor cell levels with six-minute walk performance.** We also studied associations of circulating CD34+ cells with six-minute walk test performance among the 19 participants with PAD in our pilot study. As shown in Table 4, higher numbers of circulating CD34+ cells are associated with greater distance achieved in the six-minute walk among PAD participants.

**Table 4. Associations of circulating progenitor cell concentrations with six-minute walk distance among PAD participants in our pilot study (n=19)\***

|                                 | Correlation Coefficient with six-minute walk | P Value |
|---------------------------------|----------------------------------------------|---------|
| CD34+ cell concentration        | 0.44                                         | 0.06    |
| CD34+/CD133+ cell concentration | 0.38                                         | 0.11    |

\*Excludes pilot study participants without PAD.

In addition, among the 19 PAD participants, six-minute walk distance across tertiles of CD34+ cells were Tertile 1 (fewest CD34+ cells): 1,063 feet  $\pm$  438; Tertile 2: 1,306 feet  $\pm$  347; Tertile 3 (largest number of CD34+ cells): 1,394 feet  $\pm$  268, p trend = 0.18. In summary, our preliminary data demonstrate that higher concentrations of CD34+ cells are associated with better six-minute walk performance.



**C1d. Additional evidence of our expertise with progenitor cells and PAD.** Dr. Losordo recently completed a randomized controlled trial of 28 PAD participants with critical limb ischemia who were randomized to either a control group vs. CD34+ cell mobilization, apheresis, and re-injection of CD34+ cells into calf muscle. At six-month follow-up, amputation-free survival was significantly higher among those receiving CD34+ cell calf injections as compared to the control group (hazard ratio =0.26, p=0.016). This study provides additional evidence of our expertise and the benefits of CD34+ cells for patients with PAD.

**Preliminary Data Summary.** Our prior work has established that people with PAD, both with and without intermittent claudication symptoms, have greater functional impairment and faster rates of functional decline compared to those without PAD (6-8,51,55-57). Our SILC randomized trial of exercise demonstrated that a supervised treadmill walking exercise intervention significantly improves walking performance and brachial artery flow-mediated dilation in PAD participants both with and without symptoms of intermittent claudication (44). Our pilot data demonstrate that higher concentrations of CD34+ cells are associated with better walking performance in PAD. Our preliminary work demonstrates the validity, reliability, and feasibility of our methods.

**C2. STUDY OVERVIEW.** The PROPEL study design is a randomized controlled clinical trial of 240 participants with PAD who will be randomized to one of four study arms in a 2 x 2 factorial design: Group A: GM-CSF and supervised treadmill exercise; Group B: GM-CSF and attention control condition; Group C: placebo injections and supervised treadmill exercise; Group D: placebo injections and attention control condition (Figure 2). Potentially eligible participants will be required to successfully complete a two-week combined exercise/attention control run-in period prior to randomization. The run-in will help identify potential participants unlikely to adhere to study requirements (58).

Figure 2. Study Flow

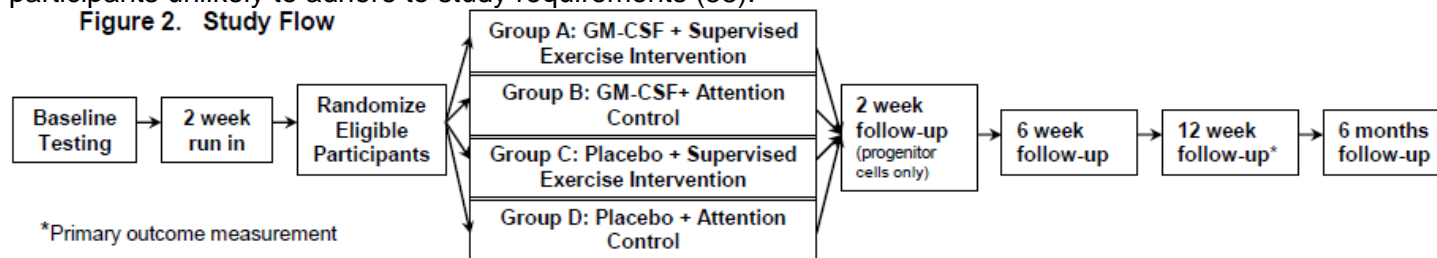

Table 5 summarizes characteristics of the four study intervention groups.

Table 5. Four Study Arms

|                | Supervised Treadmill Exercise                                                            | Attention Control Condition                                                            |
|----------------|------------------------------------------------------------------------------------------|----------------------------------------------------------------------------------------|
| <b>GM-CSF</b>  | <b>Group A.</b> GM-CSF injections x 2 weeks + Supervised treadmill exercise x 6 months   | <b>Group B.</b> GM-CSF injections x 2 weeks + Attention control condition x 6 months.  |
| <b>Placebo</b> | <b>Group C.</b> Placebo injections x 2 weeks + Supervised treadmill exercise x 6 months. | <b>Group D.</b> Placebo injections x 2 weeks + Attention control condition x 6 months. |

Table 6 shows the data collection planned at each time point. Our primary outcome is change in six-minute walk performance between baseline and 12-week follow-up.

Table 6. Data Collection Schedule for PROPEL Study

|                                                | Baseline | Two-week follow-up | Six-week follow-up | Twelve week follow-up* | Six-month follow-up |
|------------------------------------------------|----------|--------------------|--------------------|------------------------|---------------------|
| Six-minute walk.                               | X        |                    | X                  | <b>X</b>               | X                   |
| CD34+ cells and other progenitor cell measures | X        | X                  | X                  | <b>X</b>               | X                   |
| Brachial artery flow-mediated dilation.        | X        |                    | X                  | <b>X</b>               | X                   |
| Treadmill walking performance.                 | X        |                    | X                  | <b>X</b>               | X                   |

\*Time point of primary outcome measurement

We have not powered the study to test for an interaction between the two therapies. We are not necessarily looking for more than an additive benefit of GM-CSF with supervised treadmill exercise as compared to GM-CSF alone and supervised treadmill exercise alone. This is because any additional significant improvement in walking performance from combining GM-CSF and supervised treadmill exercise, compared to either therapy alone, will have significant clinical implications for PAD therapy.

**C3. Inclusion Criteria.** All participants will have PAD. PAD will be defined as follows. First, an ABI  $\leq$  0.90 at the baseline study visit is an inclusion criterion for PAD (60-63). ABI  $\leq$  0.90 is a well accepted standard for defining PAD (60-63). Second, potential participants who have an ABI  $>$  0.90 but  $\leq$  1.00 and experience a 20% drop in ABI after the heel-rise exercise will be eligible. Third, potential participants who have an ABI  $>$  0.90 but have a documented lower extremity revascularization procedure and experience a 20% drop in ABI after the heel-rise exercise will be eligible. Fourth, potential participants with an ABI  $>$  0.90 who have vascular lab evidence of PAD will be eligible.

**C4. Exclusion Criteria.** Exclusion criteria and justification for each criterion follow. 1. Potential participants with below or above-knee amputation or critical limb ischemia, those who are wheelchair confined, those who use a walking aid other than a cane (i.e. people using walkers), those who are non-English speaking, those with significant hearing or visual impairment, and those unable to return to the medical center three times weekly will be excluded because these individuals will not be able to participate fully in our intervention; 2. Potential participants diagnosed with Parkinson's disease and individuals whose walking is limited by a symptom other than PAD will be excluded because our intervention is designed specifically for individuals whose walking is limited by leg ischemia. 3. Potential participants with  $>$  Class II New York Heart Association heart failure or angina, an increase in angina symptoms during the previous 6 months, angina at rest, severe aortic stenosis, coronary ischemia during the baseline exercise treadmill test, those with a left-bundle branch block or significant ST-T wave changes on the baseline ECG precluding interpretation of the baseline exercise treadmill test, those who stop during the treadmill stress test for shortness of breath, chest pain, hip pain, knee pain, or another symptom that may not represent ischemic leg pain, stopping during the six-minute walk test for symptoms other than ischemic leg pain, or a foot ulcer will be excluded because it may not be safe for them to enter an exercise program. 4. Potential participants who have had lower extremity revascularization during the past three months, those with major orthopedic surgery during the past three months, those with myocardial infarction, ischemic stroke, or coronary artery bypass grafting during the previous three months, and those contemplating lower extremity revascularization during the next six months will be excluded because these events may influence study outcomes, independently of the study interventions; 5. Potential participants with major medical illnesses including renal disease requiring dialysis or lung disease requiring oxygen will be excluded because these and other major medical illnesses may prevent their full participation in the study. Participants who use oxygen at night may still qualify. 6. Potential participants with a Mini-Mental Status Examination (MMSE) score  $<$  23 (64) or disabling psychiatric illness will be excluded because these conditions may prevent their full study participation or ability to provide accurate responses to questionnaires; 7. Potential participants enrolled in cardiac rehabilitation during the past six months and those who are either currently enrolled in another clinical trial or who have been enrolled in another clinical trial during the past three months will be excluded because these interventions may alter outcome measures, independently of study interventions. However, for a clinical trial of stem cell or gene therapy intervention, potential participants will be potentially eligible immediately after the final study visit of the stem cell or gene therapy clinical trial, so long as at least six months has passed since the participant received their final treatment in the stem cell or gene therapy intervention. 8. Potential participants already walking for exercise at a level comparable to that targeted in the exercise intervention and those receiving G-CSF, GM-CSF, or erythropoietin within the past year will be excluded because these interventions may influence study outcomes independently of the interventions. 9. Pre-menopausal women will be excluded because cyclic estrogen changes can influence progenitor cell levels. 10. Potential participants with diabetes and documented proliferative retinopathy, those with history of myeloid malignancy, and those treated for late stage cancer during the previous three years will be excluded because GM-CSF may exacerbate these conditions. 11. Potential participants who fail to complete the study run-in requirements will be excluded because it may be difficult for them to adhere to the study requirements; 12. Potential participants who are deemed poor candidates for the study may be excluded at the discretion of the principal investigator. For example, potential participants who are argumentative or disruptive during study visits may not be well suited to the program.

**C5. Recruitment.** We will identify and randomize 267 PAD participants over 49-months, allowing for a 10% drop-out at 6-month follow-up (see timeline in our budget justification). This projected 10% drop-out rate is greater than the six-month drop-out rate of 7.7% in our recently completed SILC randomized controlled exercise clinical trial (44). Thus, our projected drop-out rate is reasonable. As in our previous clinical trials of patients with PAD, we will identify potential participants with the following methods: 1) Use of Northwestern's

Enterprise Data Warehouse to identify consecutive patients with PAD or patients at high risk for having PAD from Northwestern Medicine, including the Regional Medical Group in the western suburbs. We will contact physicians via phone, email, page, or fax prior to contacting their patients. If physicians do not reply within three weeks, up to five letters will be sent directly to the patient three weeks apart; 2) television, radio and newspaper advertising; 3) postcard mailings to men and women living in the wider Chicago area; 4) Mailed letters to participants in the Lifeline Screening program who were found to have PAD; 5) Study brochures and information flyers. 6) Mailed letters to University of Chicago patients with known PAD. A research coordinator at the University of Chicago will provide a list of patients with known PAD and NU coordinators will send letters, signed by a UofC physician, and make follow-up calls from UofC. 7) Mailed letters to Jesse Brown VA Medical Center patients with known PAD. A research coordinator with WOC status at JBVAMC will send letters to JBVAMC patients with PAD and make follow-up calls from JBVAMC. Participants recruited through these methods will sign a VA consent document and will undergo some study testing on-site at the VA. Study tests include questionnaires and functional performance measures. We have successfully used each of these methods in our prior or ongoing clinical trials of patients with PAD.

**Evidence of our experience successfully recruiting PAD participants for NHLBI-funded studies:** In the past five years we have randomized > 463 PAD participants into NHLBI-funded clinical trials. In addition, since 1998, we have enrolled more than 1,800 men and women with PAD into our NHLBI-funded studies (R01-HL58099, R01-HL073351, R01-HL071223, R01-HL073912, R01-HL083064, and R01-HL089198). We have accomplished this using methods described above and by partnering with other Chicago medical centers.

**C6. Randomization.** Participants will be randomized to one of four arms using a SAS computer program (see Table 5). Participants will be stratified by diabetes mellitus, since patients with diabetes have fewer progenitor cells than those without diabetes (49,50). Based on our prior work, we anticipate that approximately 25% to 30% of participants will have diabetes (44). Block randomization will be implemented to ensure balance between the four groups throughout recruitment. Block sizes will be randomly selected from eight and twelve.

**C7. Supervised treadmill exercise program.** Our exercise training protocol is based on prior studies, including our SILC clinical trial of exercise in PAD, and is consistent with current clinical practice guidelines for PAD patients (35,44,65-67). Our exercise intervention will be delivered three times weekly. In the first week, participants will be asked to exercise 15 minutes per session (excluding rest periods). Walking exercise duration will be increased by five minutes per session each week until 40 to 50 minutes of exercise per session is achieved (35). At this point, exercise intensity will be increased by alternately increasing treadmill speed and treadmill grade. Exercise intensity will be set to ensure that at each exercise session, participants experience ischemic leg symptoms within eight to ten minutes after onset of exercise. Participants will be asked to continue walking until they achieve leg symptom severity of "4 or 5" on a visual analog pain scale ranging from 1 to 5. After achieving leg symptom severity of "4 or 5" on the pain scale, participants will be allowed to rest until they are able to resume walking again (i.e. when pain reduces to a 2 or 1 on the scale). This method will help ensure that calf muscle ischemia is induced, releasing nitric oxide and vascular endothelial growth factor, which in turn promote release of progenitor cells (68,69). In the subset of participants without exertional leg symptoms (i.e. those with asymptomatic PAD), participants will be asked to exercise to achieve a Borg Rating of Perceived Exertion (RPE) score of 12-14 (70-73). To ensure that exercise intensity is sufficient to achieve an anaerobic state during exercise, we will measure lactic acid levels every two to four weeks at the beginning and end of exercise sessions. Participants whose lactic acid does not increase during exercise will have their exercise intensity increased at the next session and will be even more closely monitored for exercise intensity.

**C8. Attention Control Group.** Our attention control group will control for the possibility that regular contact with the study team may improve outcomes in participants randomized to supervised exercise. Participants randomized to the attention control group will attend weekly one-hour educational sessions at Northwestern University for six months. These educational sessions are on topics of interest to the typical PAD patient and are led by physicians and other health care workers. Topics include Medicare Part D, nutritional supplements, C-reactive protein, and hypertension. Sessions do not include information about exercise.

**C9. GM-CSF or placebo injections.** GM-CSF or placebo will be administered subcutaneously by a registered nurse or physician, three times weekly for two weeks, in a double-blinded fashion (i.e. both investigators and

475 participants will be blinded to receipt of medication vs. placebo). GM-CSF will be used because the most  
476 promising data regarding the association of colony stimulating factors with improved walking performance in  
477 PAD participants used GM-CSF (1). In addition, GM-CSF may be associated with a lower risk of thromboses  
478 than G-CSF (1). The dose of GM-CSF will be 250 ug/m<sup>2</sup>/day  
479 subcutaneously three times weekly for two weeks (1). Higher doses of GM-CSF are not FDA approved. The  
480 most promising preliminary study of GM-CSF to improve walking performance in PAD patients used doses of  
481 3, 6, and 10 ug/kg administered three times weekly (1). Although there was no clear linear dose-response  
482 association, the doses of 6 ug/kg and 10 ug/kg achieved the greatest number of circulating CD34+ cells,  
483 compared to the lower dose (1). The proposed dose of 250 ug/m<sup>2</sup>/day is expected to maximize benefit while  
484 minimizing side effects. To monitor for adverse effects, we will measure white blood count (WBC) once each  
485 week during the two weeks that the GM-CSF is administered. Additional WBCs might be measured at the  
486 discretion of the Safety Monitor, during the time period that study medication is administered. The study drug  
487 will be discontinued if the participant experiences an arterial thrombotic event or is hospitalized for a reason  
488 that may be related to the study drug. If a participant is hospitalized for a reason that may be related to the use  
489 of the study drug, the decision to reduce the drug dosage or discontinue the drug will be made by study safety  
490 officers Dr. Green or Dr. Lloyd-Jones on a case-by-case basis. In general, if a patient is suspected of acute  
491 coronary syndrome or a new significant arrhythmia, their study drug injections will be withheld until appropriate  
492 medical work-up is completed. If the participant is determined NOT to have an acute coronary syndrome,  
493 active coronary disease, or a significant arrhythmia, the participant may resume full doses of the study  
494 medication. However, if the participant is determined to have an acute coronary syndrome or active, significant  
495 arrhythmia, then additional receipt of study drug, at full-dose or reduced doses, will be made on a case-by-case  
496 basis by the study safety officers. The study nurse will have Tylenol available in the event of acute muscle pain  
497 following the study injection. The Tylenol will be provided by NMH pharmacy and administered at a maximum  
498 dose of 1000mg.

499  
500 **Monitored Walking Program:** Potentially eligible study participants will be telephoned by study staff and  
501 invited to participate in this walking program. Interested participants will be asked to come to our walking  
502 exercise facility (i.e. Northwestern Memorial Hospital's Cardiac Rehab program) or to Northwestern Memorial  
503 Hospital where they will be provided with a device, an accelerometer and/or a pedometer that tracks their  
504 walking exercise activity. They will be shown how to use their device. They will be asked to use their device to  
505 monitor their activity, including walking exercise activity. They will be shown how to transmit the data from their  
506 accelerometer/pedometer back to the study coach. They will also be asked to record data on exercise time  
507 and distance using a paper tracking form. They may also be asked to send a text message to the study coach  
508 at the start and end of each walking exercise session, with details about their walking activity including the  
509 duration and intensity of each walking exercise bout.

510  
511 In this monitored walking program, participants will be randomized to walk for exercise at low intensity (with  
512 minimal to no leg symptoms) or high intensity (with maximal leg symptoms during exercise activity).  
513 Participants will be asked to walk around the track at the exercise facility or up and down a hallway at  
514 Northwestern Memorial Hospital in order to learn the pace to walk according to their assignment to low  
515 intensity or high intensity exercise. Participants will then be helped to set targets (i.e. goals) for walking activity  
516 during the next week. They may be asked to return to the exercise center for additional coaching, for up to  
517 four additional sessions.

518  
519 Participants will be provided with walking exercise "tracking" forms and asked to write down their goals for  
520 home-based walking activity each day for the next two weeks and record where and when they will exercise.  
521 They will be provided with "tracking" sheets on which to record their walking activity for each week that they are  
522 in the walking exercise program. After this initial on-site visit, study participants will be telephoned weekly for  
523 up to 14 weeks by a study coach who will review their walking exercise activity and provide feedback and  
524 encouragement. Participants may be visited at home or at their own exercise facility to monitor walking  
525 intensity. Each telephone call will last approximately 15 minutes. Participants will be asked to complete some  
526 study questionnaires before and after their participation in this program. They will be asked to return to the

527 medical center for final follow-up when they have completed the program. They will return their monitoring  
528 devices at their final visit.

529  
530 **Computerized Tablet or Computer Camera Study Visit:** Potentially eligible study participants will be  
531 telephoned by study staff and informed of the option of returning for a visit where they will be taught how to  
532 operate a tablet or camera. Specifically, they will be taught how to link to video chat on the tablet or camera.  
533 They may be asked at a later date to participate in up to three video chat sessions, in which they use their  
534 tablet or computer camera at home to connect with a group leader and other study participants with peripheral  
535 artery disease. The video chat sessions will last one hour or less. Participants will be asked to return the  
536 tablets or cameras to investigators at the end of the pilot study.

537  
538 **MRI to measure lower extremity perfusion:** To measure lower extremity blood flow or perfusion, we will use  
539 techniques in a subset of up to 50 participants who provide informed consent to this optional study element. In  
540 the MRI machine, we will ask participants to push against a plastic board with their feet (i.e. a plantarflexion  
541 motion) repeatedly at a rate of one push per second. A metronome will be used to monitor the rate of pushing.  
542 Participants will be asked to push for as long as they are able. When they are too tired to continue, they will  
543 rest and perfusion to the calf muscle will be measured using MRI. This test will be conducted on a Siemens  
544 Tim Trio 3 Tesson MR or a Siemens Skyra 3 Tesson scanner at the Center for Translational Imaging (CTI)  
545 in the Olson Pavilion at Northwestern. If the designated Tim Trio or Skyra 3.0 Tesson scanner is unavailable,  
546 we will use a different 3.0 Tesson scanner at Northwestern Memorial Hospital or the center for CTI. We may  
547 perform up to 3 perfusion MRI scans on individual participants, in order to conduct a test re-test reliability  
548 assessment. We will not use any contrast for this method.

## 551 OUTCOME MEASURES.

552 **C10. Justification for measuring primary outcomes at 12-week follow-up.** We recognize that the time  
553 point at which study outcomes are maximally improved following GM-CSF therapy is unknown. The half life of  
554 GM-CSF is 162 hours (75). Peak levels of circulating CD34+ cells are observed 5-6 days after onset of GM-  
555 CSF therapy and subsequently decline even with continued GM-CSF injections (1,74,75). However, available  
556 evidence supports measurement of our primary outcomes at 12-week follow-up. First, a previous uncontrolled  
557 clinical trial of 17 patients with PAD and critical limb ischemia demonstrated measurable improvement in toe  
558 brachial pressure index, TcPO<sub>2</sub>, and pain free walking distance four-weeks after CD34+ cells were injected  
559 into calf muscle of participants (76). These improvements persisted or even further improved at 24-week  
560 follow-up (76). In a separate study, 22 patients with bilateral PAD were randomized to receive calf injections of  
561 autologous bone-marrow derived mononuclear cells vs. peripheral blood derived mononuclear cells (77).  
562 Four-weeks after the injections, measurable improvements in transcutaneous oxygen pressure and rest-pain  
563 were observed in the leg receiving bone-marrow derived cells compared to the leg receiving peripheral  
564 mononuclear cells (77). These improvements were sustained at 24-week follow-up. Third, in the study by  
565 Subramaniyam and colleagues, two-weeks of GM-CSF therapy was associated with improved treadmill  
566 walking performance and brachial artery FMD at 12-week follow-up (1). Similarly, in studies of patients with  
567 coronary artery disease, improvements in cardiac ejection fractions or regional wall motion abnormalities are  
568 typically first observed four to 12 weeks after  $\leq$  two weeks of GM-CSF therapy (78-80). These improvements  
569 are maintained or even increase during follow-up periods of up to one year (78-80). In summary, although the  
570 optimal time point for measuring improved outcomes in response to GM-CSF is not established, available data  
571 suggest that 12 weeks after therapy onset is a reasonable time point for measuring our primary outcomes.  
572 Similarly, significant improvements in treadmill walking performance are observed 12-weeks after initiation of a  
573 supervised treadmill exercise intervention (35,65-67). Our exploratory aim will assess the time course of  
574 improved outcomes in response to GM-CSF therapy with and without exercise.

575  
576 **C11. Justification for measuring CD34+ cells as the primary progenitor cell outcome.** We recognize  
577 that no single cell-surface marker is completely specific for endothelial progenitor cells (31). However, the  
578 CD34+ marker clearly identifies a population of functional progenitor cells that are released into the circulation  
579 in response to tissue ischemia, have the potential to differentiate into endothelial cells, and promote  
580 angiogenesis (22,31,32,76). Based on these prior data, CD34+ cells will be our primary progenitor cell

581 outcome measurement. Please see sections A3 and A4 for further discussion of this issue. In exploratory  
 582 analyses, we will also measure CD133+ cells, KDR+ cells, ALDH bright cells, combinations of these cell  
 583 markers, and progenitor cell colony forming units. It is important to point out that, compared to CD34+ cells,  
 584 these exploratory progenitor cell measures have not been as consistently linked to favorable outcomes in  
 585 patients with cardiovascular disease. **Progenitor Cell Measures.** CD34+ cell measurements will take place in  
 586 Dr. Losordo's laboratory using methods implemented for our pilot study (see sections C1b and C1c). Total  
 587 human peripheral blood mononuclear cells (MNCs) are isolated from the blood of participants by Ficoll density  
 588 gradient centrifugation with Histopaque-1077 (Sigma), according to the manufacturer's instructions. Briefly,  
 589 MNCs are aliquoted ( $5 \times 10^5$ ) to an Aldecourt tube, incubated with BODIPY-AAD for 30 minutes at 37°C, and  
 590 maintained on ice to prevent fluorescent byproduct exiting cells. Cells are washed in ALDH assay buffer at 4  
 591 degrees Celsius for 5 minutes and re-suspended in 90ul ALDH Assay buffer for further staining. ALDH labeled  
 592 MNCs are incubated with FcR Blocking Reagent (Miltenyi Biotec) for 10 minutes followed by specific FACS  
 593 antibodies for 30 minutes on ice to identify the CD34-PE Cy7 (Beckman Coulter) endothelial marker (primary  
 594 outcome) and other cell surface markers (exploratory outcomes). These exploratory cell markers include  
 595 CD133-APC (Miltenyi Biotec) and VEGF R2 / KDR-PE (R&D Biosystems). Dead and dying cells are excluded  
 596 using staining with 7-AAD ( $1 \mu\text{g}/10^6$  cells; Invitrogen). Directly conjugated isotype control antibodies are used to  
 597 set baseline fluorescence levels. Flow cytometry is performed by Northwestern's Cancer Core Research  
 598 facility, blinded to patient identity and group assignment using the DakoCytomation CyAn FACS instrument.  
 599 Analyses are performed using the FlowJo software (Treestar). Gating mononuclear cells is performed on the  
 600 basis of light-scattering properties. The labeled cells of interest (i.e. CD34+ cells) are expressed as  
 601 percentages of live mononuclear cells. **Progenitor cell colony forming unit assay.** Total human peripheral  
 602 blood mononuclear cells (PBMNC) will be isolated from blood by Ficoll density gradient centrifugation with  
 603 Histopaque-1077 (Sigma) according to manufacturer instructions. PBMNC will be re-suspended in endothelial  
 604 cell basal medium-2 (EBM-2, Clonetics) supplemented with 5% FBS, human vascular endothelial growth factor  
 605 (VEGF)-A, human fibroblast growth factor-2, human epidermal growth factor, insulin-like growth factor-1,  
 606 ascorbic acid, and antibiotics and then plated on fibronectin-coated 6 well plates at a concentration of 5 million  
 607 cells per well. The endothelial colonies will be counted manually on day 7 by two investigators blinded to the  
 608 study group assignments. Progenitor cells will be further characterized by dual-staining for Dil-Ac-LDL and  
 609 Lectin and by the expression of endothelial marker proteins VEGFR-2, VE-cadherin, eNOS, and vWF.

610  
 611 In addition to measuring progenitor cells at the frequency shown in Table 6 above, in up to 50 participants with  
 612 PAD we will measure progenitor cell levels before and immediately following the treadmill exercise stress test.  
 613 We may also measure progenitor cell levels one hour post-exercise and one day post-exercise. The treadmill  
 614 exercise stress test at which this may occur may be affiliated with any of the visits shown in Table 6. However,  
 615 it is possible that the participant may be asked to undergo an additional treadmill exercise stress test in order  
 616 to expedite collecting data on progenitor cell levels before and after an exercise stress test. Also- up to 30  
 617 participants who are determined ineligible for the study due to absence of PAD will be invited to participate in  
 618 an exercise treadmill stress test. Levels of progenitor cells will be measured before and after the exercise  
 619 treadmill stress test in these individuals without PAD as well as one hour post-exercise and one day post-  
 620 exercise. These additional procedures will allow us to achieve our exploratory aim #5 above.

621  
 622 **C12. Six-minute walk.** Our primary outcome is change in the distance achieved in the six-minute walk test  
 623 between baseline and 12-week follow-up. The six-minute walk is our primary outcome measure for several  
 624 reasons. First, our work demonstrates that for PAD participants, performance on the six-minute walk test is  
 625 more closely correlated with walking performance during daily life than treadmill walking performance (81).  
 626 Secondly, for elderly patients, such as those with PAD, treadmill walking is associated with balance problems  
 627 and anxiety (52-54). A previous study of 12 healthy elderly volunteers (ages 71-80 years) and 12 healthy  
 628 young volunteers (ages 21-37) compared physiologic responses and steps per minute during a treadmill  
 629 exercise test vs. the six-minute walk (corridor walking) performed on three separate occasions (52). The  
 630 elderly group, but not the younger group, had consistently higher heart rates and lower step rates during the  
 631 treadmill test than during the corridor walks (52). Third, treadmill walking is associated with a significant  
 632 learning effect (82-84). Supervised treadmill exercise interventions, such as that proposed in the current study,  
 633 can improve treadmill walking performance in part because of the "practice" associated with the three times  
 634 weekly treadmill exercise sessions. In the six-minute walk, participants walk back and forth along a 100-ft

635 hallway for six minutes after standardized instructions to complete as many laps as possible (44,81,85).  
636 Distance covered in six minutes is recorded. The intra-class correlation coefficient for the test-retest reliability  
637 of the six-minute walk test among 156 PAD participants in our SILC exercise trial was 0.90 ( $p < 0.001$ ) when two  
638 six-minute walk tests were completed one to two weeks apart (44).

639  
640 **C13. Treadmill testing.** The Gardner graded treadmill exercise test is the standard, accepted treadmill  
641 protocol for measuring change in maximal treadmill walking time in response to interventions among PAD  
642 participants (82-84). The FDA requires treadmill evidence when evaluating therapeutic drugs for improving  
643 walking performance in PAD. In the Gardner exercise protocol, speed is maintained at 2.0 miles per hour  
644 (mph) and treadmill grade increases by 2.0% every two minutes (82-84). If patients cannot walk at 2.0 mph,  
645 treadmill speed is started at 0.50 mph and increased by 0.50 mph every 2 minutes until the participant reaches  
646 2.0 mph, after which the treadmill grade is increased every two minutes.

647  
648 **C14. Brachial Artery Flow-Mediated Dilation (FMD).** As in our prior studies (44,86,87), brachial artery  
649 imaging will be performed by a Registered Diagnostic Cardiac Sonographer (44,86,87). Participants withhold  
650 vasoactive medications, refrain from smoking, and fast prior to testing (86,86). With the participant supine, a  
651 blood pressure cuff over the upper arm is inflated for four minutes. The inflation pressure is systolic blood  
652 pressure (SBP) + 50 mmHg. The brachial artery is imaged (B-mode and Doppler) 5 to 9 cm above the  
653 antecubital fossa using a linear array vascular ultrasound transducer (Siemens Medical Solutions, Sequoia  
654 Model #256, frequency 8 MHz). Three video sequences are obtained. The first verifies the location and  
655 baseline hemodynamic state of the brachial artery. The second begins 20 seconds before cuff inflation and  
656 continues for 10 seconds after inflation. The third begins 15 seconds before cuff release and continues for 90  
657 seconds after deflation. Brachial artery FMD is calculated as the percent change in brachial artery diameter at  
658 60 seconds after the release of the cuff. Because previous studies of coronary artery disease patients  
659 consistently show that brachial artery endothelial independent function does not change in response to  
660 interventions, we will not measure nitroglycerin-mediated vasodilation (89,90). Changes in brachial artery FMD  
661 will be read by Dr. James Stein's University of Wisconsin Atherosclerosis Imaging Research Program Core  
662 Laboratory. Images are read by a single reader blinded to participant characteristics. Measurement  
663 reproducibility in Dr. Stein's laboratory has a median FMD difference of 0.02% (inter-quartile range: -0.03–  
664 0.04).

665  
666 **C15. Other measures.** As in our previous clinical trials, patient report will be used to document comorbidities.  
667 Patient reported comorbid disease is highly correlated with presence of comorbid disease measured with  
668 medical record review (91-95). In the National Hospital Discharge Survey of 122 elderly men and women, the  
669 percent agreement between patient report and medical record review was 85% for angina, 89% for cancer,  
670 98% for diabetes, 94% for myocardial infarction, and 98% for stroke (92). Participants will be asked to bring  
671 their medication bottles for assessment of medication use at baseline and at follow-up visits. Patient-report is  
672 an accurate measure of cigarette smoking in PAD patients (96).

673  
674 Some or all study measures may be repeated at baseline or follow-up for data quality (one potential example is  
675 if a treadmill test must be stopped due to extremely high blood pressure before the patient completed the test).

676  
677  
678 **C16. Quality Control.** As in our prior studies, health interviewers will be trained by a senior coordinator and  
679 certified by Dr. McDermott in each component of data collection, using a detailed checklist developed for the  
680 study (see Appendix A for example checklist). Health interviewers are rigorously evaluated for adherence to  
681 protocol, delineated in our manuals, prior to beginning data collection and every six months after initial  
682 certification. When deficiencies are identified, interviewers undergo additional training and re-assessment. Ten  
683 percent of participants are randomly identified for quality control. This subset has their ABI measured twice by  
684 independent examiners and has an extra blood sample obtained for quality control assessment of progenitor  
685 cells. The second blood sample is designated an arbitrary identification number to which the technician is  
686 blinded. Thus, quality control is monitored continuously. A randomly selected 10% subset of exercise session  
687 charts will be reviewed by Dr. McDermott to ensure protocol adherence. Dr. McDermott also attends one or  
688 more exercise sessions on a monthly basis to ensure adherence to protocol. Furthermore, during the first year

of the study, 10 participants will be selected for a second brachial artery FMD. These participants will be asked to return within two weeks (1-14 days, but not on the same day as the first FMD) after their baseline testing and before randomization for a repeat brachial artery FMD measurement. The purpose of this re-test is to assess the test re-test reliability of the brachial artery FMD measurement.

**C17. Blinding for data collection.** The health interviewer collecting outcome data will be blinded to the study group assignment. Participants are instructed not to reveal their group assignment. If a participant reveals their group assignment, another certified health interviewer is paged to continue the visit.

**C18. Data Management.** We will use methods in place for our previous and ongoing PAD studies to customize a data management system for the PROPEL Study. Data from baseline and follow-up visits will be acquired on paper and processed using the Teleform system by Cardiff Software. We have successfully used the Teleform system for over 6,000 patient visits in previous and ongoing studies. Teleform has three components. The first component, the Designer, functions as a page layout program with predefined tools for creating check boxes, bar code fields, and hand print fields. Form packets are assembled and individualized with ID labels prior to each visit. Completed forms are scanned using a high-speed scanner. The second component, the Reader, accepts scanned images and translates user responses (check marks, circles, or hand-printed text) into machine-readable responses. The third component, the Verifier, double-checks user responses prior to final acceptance. The Verifier is programmed with the data validation rules established when the form was created. Data are routinely backed-up and copied to CDROM for secure off-site storage.

**C19. Data and Safety Monitoring Board (DSMB).** As per NHLBI guidelines, the DSMB will be appointed by the NHLBI. The DSMB will review and approve the protocol prior to beginning recruitment. The DSMB will meet every six months. Adverse events will be monitored continuously throughout the study and will be reported to the DSMB and IRB promptly. See Section D2 below for more information about the DSMB.

**C20. Statistical Power Considerations.** As indicated above, the four study arms are defined as follows: Group A: GM-CSF combined with supervised treadmill exercise; Group B: GM-CSF therapy + an attention control group; Group C: placebo + supervised exercise; and Group D: placebo + attention control group. From this point forward, “GM-CSF combined with supervised treadmill exercise” refers to Group A; “GM-CSF therapy alone” refers to Group B, “supervised exercise therapy alone” refers to Group C, and placebo + attention control group (i.e. no active therapy) refers to Group D.

In our primary aim, we will determine at 12-week follow-up: (a) whether GM-CSF therapy combined with supervised treadmill exercise (Group A) significantly improves six-minute walk performance compared to GM-CSF therapy alone (Group B), (b) whether GM-CSF therapy combined with supervised treadmill exercise (Group A) significantly improves six-minute walk performance compared to supervised exercise therapy alone (Group C) and (c) whether GM-CSF therapy alone (Group B) significantly improves six-minute walk performance compared to placebo (Group D). We will also confirm the previously established association between supervised treadmill exercise (Group C) and improved six-minute walk performance, compared to no active therapy (Group D).

The final sample size in the PROPEL Trial, of 210 participants, was lower than the originally intended sample size of 240 participants. Prior to analyzing the data, investigators propose to alter the statistical analysis plan. The new statistical analysis plan allows us to address our original hypotheses but with greater statistical power, given the slightly lower sample size than originally intended. The revised statistical plan is as follows. The significance levels of the four primary comparisons will be determined using the Hochberg’s step up method rather than the conservative Bonferroni correction. Specifically, we will sort the p-values from the smallest to the biggest as  $p_{(1)} < p_{(2)} < p_{(3)} < p_{(4)}$ . For the purposes of the analysis plan, the “hypothesis” refers to the null hypothesis. Rejecting all four hypotheses indicates that the hypotheses specified in our specific aims above are correct. Under this assumption, we will

(1) reject all four hypothesis if  $p_{(4)} \leq 0.05$ ;



- 741 (2) otherwise, we will reject hypotheses (1-3), if  $p_{(3)} < 0.05/2$ ;  
 742 (3) otherwise, we will reject hypotheses (1-2), if  $p_{(2)} < 0.05/3$ ;  
 743 (4) otherwise, we will reject the hypothesis (1), if  $p_{(1)} < 0.05/4$

744  
 745 The Hochberg's step up method also controls the family-wise type one error and is more powerful than the  
 746 Bonferroni adjustment.

747  
 748 **C21. Statistical Analyses Methods.** Change in six minute walking distance at 12-week follow-up is our  
 749 primary outcome. Changes in brachial artery FMD, maximal treadmill walking time, and CD34+ cells at 12-  
 750 week follow-up are secondary outcomes. The distributions of each outcome will be examined and appropriate  
 751 transformations will be performed if necessary. Prior to the analyses, baseline characteristics (i.e., age, sex,  
 752 race, baseline six-minute walk, ABI, CD34+ cells, and other relevant variables) will be compared between the  
 753 four groups, using a F-test or Chi-Square test to ensure that baseline characteristics are balanced across the  
 754 four groups. Any variables that are significantly different between groups will be adjusted for as covariates.  
 755

756 For our Primary Aim, we will compare changes in six minute walk distance from baseline to 12-week follow-up  
 757 between Groups A and B, between Groups A and C, between Groups B and D, and between Groups C and D  
 758 using a two-sample t-test. Analysis of covariance will be used to adjust for baseline characteristics as  
 759 necessary. For our Secondary Aim, we will compare changes in brachial artery FMD and maximal treadmill  
 760 walking time from baseline to 12-week follow-up between Groups A and B, between Groups A and C, and  
 761 between Groups B and D. We will also determine whether participants in Group C have greater increases in  
 762 CD34+ cells at 12-week follow-up, compared to Group D. The two-sample t-test or analysis of covariance will  
 763 be used for these comparisons. Efficiency augmentation methods for estimating the treatment effects using the  
 764 distribution of baseline characteristics will be employed (96). The 95% confidence interval of the treatment  
 765 effects will be constructed. Because the primary aim of the study is to demonstrate the superiority of Group A  
 766 (GM-CSF + supervised exercise) as compared to Group B (GM-CSF alone) and Group C (supervised exercise  
 767 alone), the commonly used two-way analysis of variance will be used only in supplementary analysis.  
 768 Specifically, for the outcomes of interest in our primary and secondary aims, we will test the interaction  
 769 between GM-CSF and supervised exercise with two-way ANOVA. In the absence of an interaction (i.e., the p  
 770 value for the interaction term exceeds 0.25), we will further estimate the additive effect of GM-CSF and  
 771 supervised exercise simultaneously in all 240 participants. Here, the existence of model-based additive effects  
 772 for GM-CSF and exercise is much stronger than the targeted superiority of the combined treatments.  
 773

774 For our Exploratory Aims, we will use linear mixed effects regression analyses to compare changes in six-  
 775 minute walk performance, maximal treadmill walking time, and brachial artery FMD between baseline and six-  
 776 week follow-up and between baseline and six month follow-up between Groups A and B, Groups A and C,  
 777 Groups B and D, and Groups C and D. We will use linear mixed effects regression analyses to compare  
 778 changes in progenitor cell measures between baseline and six-week follow-up and between baseline and six-  
 779 month follow-up between Groups C and D. Outcomes measured at baseline and each follow-up visit will be  
 780 longitudinal response variables in the regression model. The regression coefficients for the interactions  
 781 between group indicators and visit time are parameters of interest. The subject specific random intercept will  
 782 be used to incorporate the within subject correlations. For our Exploratory Aim #4, we will employ linear mixed  
 783 regression analysis to evaluate the association between changes in CD34+ cells and other progenitor cell  
 784 measures from baseline to two-week follow-up with changes in six-minute walk distance, brachial artery FMD,  
 785 and maximal treadmill walking time between baseline and six-week, twelve-week, and six-month follow-up  
 786 visits. The responses are longitudinally measured outcomes of change between baseline and the six-week,  
 787 twelve-week, and six-month visits, respectively. The independent variables of interest are changes in CD34+  
 788 cells and other progenitor cell measures from baseline to two-week follow-up. We will employ similar linear  
 789 mixed regression analysis to evaluate associations between changes in progenitor cells between baseline and  
 790 six-week, 12-week, and six-month follow-up with changes in six-minute walk distance, brachial artery FMD,  
 791 and maximal treadmill walking time during the corresponding time period. The responses are longitudinally  
 792 measured outcomes of change between baseline and the six-week, twelve-week, and six-month visits,

793 respectively. Independent variables of interest are changes in progenitor cells from baseline to six-week, 12-  
794 week, and six-month follow-up. Finally, we will perform regression analyses among participants randomized to  
795 the exercise group to determine whether the degree of increase in lactate levels during exercise sessions is  
796 associated with the degree of increase in progenitor cells.

797  
798 **C22. Intention to Treat.** In all comparisons, we will employ the intention-to-treat principle. Participants will  
799 remain in their originally assigned groups for analyses, regardless of adherence to their assigned group.  
800 Based on our experience in our SILC clinical trial, the drop-out rate is expected to be <10% at six-month  
801 follow-up. Therefore, complete case analysis coupled with reasonable sensitivity analysis should be adequate  
802 to handle the problem of missing data. If the drop-out rate exceeds five percent, we will employ more  
803 sophisticated statistical methods such as multiple imputation and the pattern mixture approach to correct for  
804 the potential bias of estimates from simple complete-case analysis due to informative missing data. The study  
805 team has substantial experience employing these methods in prior studies (44,97,98). We will use the type  
806 one error value of 0.0125 to cope with multiple comparisons.

807  
808 **C23. Follow-up window.** Follow-up testing will be completed within one week before or after the target follow-  
809 up date, at the 2-week, 6-week, 12-week, and 26-week follow-up time points after randomization. However, if  
810 the follow-up visit cannot be performed within the one week before or after the due date for each follow-up visit  
811 (e.g. if a participant is sick and unable to return to the center for testing within the follow-up window), we will  
812 obtain follow-up measures at any point up until the next scheduled follow-up test. For example, if we are  
813 unable to obtain the 12-week follow-up measures within the window, we will attempt to obtain the measures  
814 until the 26-week follow-up testing window begins.

## 815 **D. HUMAN SUBJECTS.**

816 **D1. Risks to the subjects.** As described in section C.2 above, subjects will be randomized to one of four  
817 groups: Group A: GM-CSF and supervised treadmill exercise; Group B: GM-CSF and attention control  
818 condition; Group C: placebo injections and supervised treadmill exercise; Group D: placebo injections and  
819 attention control condition (see Figure 2). Study participation will last for 6 months. Participants receiving GM-  
820 CSF will receive a GM-CSF injection three times weekly for the first two weeks after randomization.  
821 Participants receiving placebo injections (rather than GM-CSF) will receive a placebo injection three times  
822 weekly for two weeks. Participants randomized to supervised treadmill exercise will exercise three times  
823 weekly for six months with a trainer at the study exercise facility. Participants randomized to the attention  
824 control group will attend weekly educational sessions at Northwestern University Feinberg School of Medicine  
825 for six months. We will randomize a total of 267 participants with peripheral arterial disease (PAD). Based on  
826 our prior work, we expect that 240 participants will complete the study. Based on our previous work involving  
827 participants with PAD, we anticipate that the average age will be approximately 70 years, that at least 33% of  
828 participants will be minorities, and that approximately 50% will be women. For example, in our recently  
829 completed SILC randomized controlled clinical trial of exercise in patients with PAD (see section A7 above)  
830 (44), participants were average age  $70.6 \pm 10.3$  and the average ABI was  $0.61 \pm 0.17$ . In SILC, participants  
831 included 52% women and 45% African-Americans. In general, patients with PAD have a relatively high  
832 prevalence of comorbid diseases, particularly coronary artery disease, cerebrovascular disease, diabetes  
833 mellitus, and pulmonary disease. Thus the patient population is likely to be of generally poorer health than that  
834 of similarly aged men and women without PAD in the general population. However, subjects must be willing to  
835 travel to the medical center three times weekly in order to participate. This requirement will necessarily  
836 eliminate some potential participants who are more frail. Inclusion and exclusion criteria are provided in  
837 sections C.3 and C.4 above. **Vulnerable populations (fetuses, pregnant women, children, prisoners, and**  
838 **institutionalized persons) will not be included in this study.**

839  
840  
841 **Sources of material.** Primary and secondary outcome measures that will be collected for this study are  
842 shown in Table 6 and include the six-minute walk test, treadmill walking performance, progenitor cell  
843 measures, and brachial artery flow-mediated dilation (FMD). We will also administer questionnaires to  
844 participants at baseline and at each follow-up visit to assess their medical history, including presence of  
845 comorbidities, medication use, smoking status, and other health characteristics. Data collection will not make

846 use of existing records or data. The prevalence of comorbid disease will be measured based on patient report,  
847 based on previous study (91-95) (see section C.15 above).  
848

849 **Potential risks.** GM-CSF is an FDA-approved medication, available commercially. GM-CSF is produced  
850 using recombinant DNA technology. Side effects of GM-CSF include myalgias, arthralgias, fever, fatigue, and  
851 headache (99, 100, 101). Splenic enlargement, usually subclinical, can occur. Splenic rupture related to GM-  
852 CSF therapy is rare (100). Additional rare but serious side effects, such as allergy or thrombotic events have  
853 also been observed (101).  
854

855 The exercise program might be associated with an increased risk of heart attack, arrhythmia, or death. In  
856 addition, patients may develop ischemic chest pains during exercise. If participants develop chest pain during  
857 exercise, Dr. McDermott, Dr. Lloyd-Jones, or Dr. Losordo will be notified immediately. Dr. McDermott will  
858 oversee arrangement of appropriate follow-up (including immediate transport to the emergency room if  
859 appropriate). The exercise physiologist is certified in Cardiopulmonary Resuscitation (CPR) and use of an  
860 Automatic External Defibrillator (AED). Safety manuals and protocols will be developed prior to beginning the  
861 intervention. Chest pain symptoms during exercise may result in additional cardiac work-up that may lead to  
862 procedures to improve coronary blood flow. Subjects will be screened for active heart problems with a  
863 baseline exercise treadmill test prior to enrollment, according to currently recommended standards of  
864 screening PAD patients for coronary artery disease prior to their beginning an exercise program (35). These  
865 exercise stress tests will be performed as part of our protocol and interpreted by board-certified cardiologist  
866 and co-investigator Dr. Lloyd-Jones. Participants must have a normal 12-lead exercise stress test to be  
867 eligible. Abnormal baseline exercise stress tests may lead to additional cardiac work-up by the participant's  
868 physician that may lead to coronary angiography or coronary revascularization. If the baseline exercise stress  
869 test is equivocal or abnormal, the participant must demonstrate evidence of a recent (within the past six  
870 months) normal coronary perfusion test or coronary angiogram in order to be eligible for participation. The  
871 latter tests would be ordered by the participant's physician at their discretion.  
872

873 Exercise may also be associated with muscle fatigue or soreness or dehydration which can result in fainting.  
874 This typically resolves with rest. The risks associated with baseline and follow-up testing include discomfort or  
875 pain in the extremities during the ankle brachial index test and falling during the walking tests. The ankle  
876 brachial index will be aborted if a participant experiences severe pain during the testing. The research  
877 assistant collecting these data has been trained to prevent falling. The risk of falling is less than 1 in 200.  
878 Falling during these tests may be associated with fracture. The risk of a fracture secondary to a fall during the  
879 walking tests is less than 1 in 5,000.  
880

881 **D2. Adequacy of protection against risk.** Recruitment methods are described in section C5 above.  
882 Informed consent will be obtained at the time of the initial study visit. Subjects will be asked to read and sign  
883 the study consent form. A research assistant will administer the consent form and answer questions. The  
884 research staff has undergone human subjects training required by our institutional review board. This training  
885 includes information about the importance of maintaining confidentiality of personal health information. The  
886 study principal investigator or a co-investigator will be available to answer any questions as needed. Both the  
887 subjects and the individual administering the consent form will sign the consent form.  
888

889 **Methods to minimize potential risks.** *Minimizing risks related to GM-CSF.* The GM-CSF dose to be  
890 administered is an FDA-approved dose with demonstrated safety in participants with PAD (1). GM-CSF will be  
891 administered in our clinical research unit (CRU) by a registered nurse, who has experience administering GM-  
892 CSF, or a physician. Participants will be monitored in the CRU and during their return visits for side effects  
893 related to GM-CSF. Specifically, the blood pressure, temperature, and heart rate of each participant will be  
894 obtained before and after each injection of the study drug (GM-CSF) or placebo. Following the first injection,  
895 participants will be monitored for 2 hours, with blood pressure and pulse obtained every 15 minutes. If a  
896 participant is randomized to the treadmill exercise intervention, the participant will not attend the treadmill  
897 exercise session on the date of the first injection. Following injections 2 through 6, the participant will be  
898 monitored for 20 minutes. Participants will be educated about side effects to watch for and will be asked to  
899 contact Dr. McDermott promptly should any significant side effects develop. Dr. McDermott's pager and home

900 telephone number will be provided to study participants. In addition, guidelines for dose reduction have been  
901 developed. For example, the dose of the study drug may be decreased by study investigator Dr. David Green  
902 or another un-blinded study physician based on the results of the white blood count.  
903

904 *Minimizing risks related to exercise.* According to current clinical practice guidelines (35), all participants will  
905 undergo baseline exercise stress testing prior to randomization into one of the study groups. Potential  
906 participants with an abnormal baseline exercise stress test will be excluded. A physical examination will be  
907 completed by a physician during baseline assessments to help ensure that study participation is safe. In  
908 addition, participants will be monitored during exercise for development of chest discomfort, new dyspnea, or  
909 new fatigue during exertion. Dr. McDermott will be promptly notified when this occurs (by pager). Our exercise  
910 physiologists have significant experience working with populations of participants with peripheral arterial  
911 disease and have been trained in CPR, ACLS, and use of the automatic external defibrillator.  
912

913 *Minimizing risk related to baseline and follow-up testing.* All study coordinators undergo baseline training and  
914 are certified by Dr. McDermott before beginning data collection. Training and certification involves ensuring  
915 that coordinators are trained in methods to help minimize falls. Dr. McDermott re-certifies coordinators every  
916 six months to ensure continued adherence to study protocol. Those who are not adhering to protocol undergo  
917 additional training followed by re-certification.  
918

919 *Minimizing risk related to loss of confidentiality.* A number of methods will be employed to maintain  
920 confidentiality of participants. First, study recruitment letters will be mailed, using IRB-approved methods, only  
921 after receiving written permission from the participant's physician. The personal physician of each study  
922 participant will have the option of **not** allowing investigators to contact the potential participant. Lists of  
923 potentially eligible participants will be obtained by individuals who normally have access to these lists as part of  
924 their daily work requirements. Recruitment letters for potential participants identified from hospital and  
925 outpatient lists are prepared by research staff members whose job is to assist study investigators with  
926 recruitment. These research staff members have completed training in the ethical conduct of human subject  
927 research, including maintaining participant confidentiality. Recruitment letters to potential participants identified  
928 from medical center lists are mailed in sealed envelopes and addressed to the potential participant. All  
929 potential participants who receive mailed information about the study after the approval from their physician will  
930 have the opportunity to call a voice-mail system to ask NOT to be further contacted about this study.  
931 Secondly, only study investigators and key research staff will have access to the study database. Third,  
932 participants will be assigned a unique study identifier. Individual names will ultimately be removed from the  
933 study database and only the unique study identifier will be used to distinguish participants in the database.  
934 Fourth, collected data will be maintained in locked computer files and file cabinets to which only study  
935 investigators have access. Collected data will be used only for research purposes. Any published data will not  
936 contain any individual identifiers.  
937

938 **Data and Safety Monitoring Board (DSMB).** As per NHLBI guidelines, the DSMB will be appointed by the  
939 NHLBI. The DSMB will meet at least every six months during the study. They will meet to review and approve  
940 the protocol prior to beginning data collection. They will decide on specific stopping criteria for the study.  
941 However, because of the short duration of the study and because of our secondary and exploratory aims, there  
942 will be no criteria for stopping due to benefit. The biostatisticians and data manager will work closely with the  
943 DSMB to perform interim analyses. However, since the sample size is small and the follow-up is only six  
944 months, we do not plan to have any stopping criteria for beneficial effect. Rather, we will develop stopping  
945 criteria only for adverse effects.  
946

947 Adverse events will be monitored continuously throughout the study and will be reported to the DSMB and IRB  
948 in a timely manner according to pre-specified requirements. Adverse event rates and interim study results will  
949 be reviewed and discussed by the DSMB at the DSMB meetings. At least four categories of adverse events  
950 will be defined: a) Death; b) cardiovascular events (myocardial infarction, stroke, and coronary arrhythmias) c)  
951 musculoskeletal outcomes (muscle soreness, foot ulcer, joint aches and pains); d) additional adverse  
952 symptoms and events (headache, fatigue, arthralgias, fever, allergy related to GM-CSF, splenic rupture related  
953 to GM-CSF). We will also monitor all hospitalizations. We will use a designated data collection form to record

954 these events and they will be reported immediately to the Institutional Review Board and DSMB. Note that to  
955 date, however, exercise programs and GM-CSF have been demonstrated to be safe in patients with PAD  
956 (1,35,44).  
957

958 The biostatisticians and data manager will work closely with the DSMB to perform interim analyses. However,  
959 since the sample size is small and the follow-up is only six months, we do not plan to have any stopping criteria  
960 for beneficial effect. Rather, we will develop stopping criteria only for adverse effects. For the proposed semi-  
961 annual DSMB meetings, data will be edited and cleaned contemporaneously to data collection. Analyses will  
962 be done according to the requests of the DSMB. In addition, for each major adverse event, the group  
963 assignment of the patient will be provided. In this way the DSMB can determine whether the event is  
964 intervention related.  
965

966 **D3. Potential benefits of the proposed research.** Preliminary evidence suggests that increasing circulating  
967 levels of CD34+ cells with granulocyte monocyte colony stimulating factor (GM-CSF) or other therapies may  
968 improve walking performance in patients with lower extremity peripheral arterial disease (PAD) (1,2).  
969 However, results of small clinical trials are mixed (1-4). The association of GM-CSF with improved walking  
970 performance in PAD is not definitively established. Preliminary data also suggest that lower extremity  
971 ischemia, induced during walking exercise, may increase circulating CD34+ cell levels, enhance homing of  
972 CD34+ cells to ischemic sites, and **augment** the ability of GM-CSF to improve walking performance in PAD  
973 (1,2). However, whether the combination of GM-CSF and supervised treadmill exercise improve walking  
974 performance more than GM-CSF and supervised treadmill exercise, respectively, is currently unknown. This  
975 proposed clinical trial is needed to definitively establish a) whether the combination of supervised treadmill  
976 exercise and GM-CSF improves functional performance in PAD participants with and without intermittent  
977 claudication more than either intervention individually; b) whether GM-CSF improves functional performance in  
978 PAD patients with and without intermittent claudication as compared to placebo; c) whether supervised  
979 treadmill exercise increases circulating levels of CD34+ cells; d) whether the degree of increase in CD34+ cells  
980 is associated with the degree of improvement in six-minute walk performance; e) the temporal trajectory of  
981 improvement in study outcomes in response to study interventions and increases in progenitor cells. In  
982 addition to establishing the therapeutic benefit of GM-CSF with and without supervised treadmill exercise, this  
983 proposed study is expected to identify biological pathways associated with improved functional performance in  
984 patients with PAD. This information is expected to lead to new therapies to improve walking performance in  
985 patients with PAD.  
986

987 **D4. Importance of knowledge to be gained.** Lower extremity peripheral arterial disease (PAD) is common.  
988 Currently 8 million men and women in the United States (U.S.) have PAD (5). The number of individuals with  
989 PAD is expected to increase as the U.S. population lives to older ages with chronic disease. Our prior work  
990 and that of others shows that patients with PAD have greater functional impairment, increased rates of  
991 functional decline, and increased mobility loss compared to persons without PAD (6-11). Older patients with  
992 functional impairment are less likely to remain independent in the community, have higher rates of  
993 hospitalization, and have poorer quality of life than those without functional impairment (12). Yet few therapies  
994 have been identified that improve lower extremity functioning or prevent functional decline or mobility loss in  
995 persons with PAD. Only two FDA-approved medications improve functional performance in patients with PAD.  
996 Identifying biological pathways associated with improved functional performance in PAD is expected to lead to  
997 new therapies to help patients with PAD preserve their functional performance and avoid decline. These  
998 findings will have important public health implications for preventing disability and nursing home placement for  
999 a large number of individuals.  
000

001 **D5. Collaborating sites.** Brachial artery flow-mediated dilation results will be interpreted by Dr. James  
002 Stein's laboratory at the University of Wisconsin Medical School. Videotapes of the brachial artery flow  
003 mediated dilation measurement will be mailed to Dr. Stein's laboratory and results will be returned to  
004 Northwestern investigators. We have experience working with Dr. Stein in this capacity in our recently  
005 completed randomized controlled trial of exercise in patients with PAD (44). Dr. Lu Tian, assistant professor in  
006 the Department of Biostatistics at Stanford, will assist with statistical analyses. Dr. Tian was previously a  
007 faculty member at Northwestern University and has worked with Dr. McDermott, Dr. Liu, and other study

investigators for more than five years. Drs. Michael H. Criqui (University of California at San Diego), Jack M. Guralnik (National Institute on Aging), and Luigi Ferrucci (National Institute on Aging) have worked with Dr. McDermott on PAD studies of functional impairment for over nine years and bring expertise in functional assessment, PAD, and clinical trials to the study team. Drs. Brian Annex and Doris Taylor bring expertise in PAD, clinical trials, and/or progenitor cell measurement and interpretation to the study team.

**E. Inclusion of Women/Minorities.** PAD is common among older women and among African-Americans (102). We will ensure that our study population includes at least approximately 50% women and at least approximately 25% African-American (see enrollment table). We do not anticipate difficulty achieving these recruitment targets, since our recently completed randomized controlled clinical trial of exercise in participants with PAD included 52% women and 40% minorities (44). Our group has substantial experience successfully recruiting and enrolling women and minorities for our observational and clinical trial research in participants with PAD.

**Methods to ensure adequate enrollment of women and minorities.** To ensure that we achieve a study population that includes approximately 50% women and at least 25% minorities, we will make study participation as simple and enjoyable as possible for women and minority participants. For example, we can provide door-to-door transportation to study visits. We have also advertised our research opportunities on radio or in newspapers for which the audience includes a high proportion of minority populations. If we still have difficulty recruiting significant proportions of minorities, we will enlist minority leaders in the community to assist with recruitment and we will make a substantial effort to hire an African-American research assistant to assist us with recruitment.

**Alternatives should the above methods be insufficient.** If the above methods are not sufficient, then we will expand our recruitment of participants to hospitals in which the majority of patients are minorities. For example, colleague and vascular surgeon Dr. Walter McCarthy is director of the non-invasive vascular laboratory at Cook County Hospital in Chicago. Similarly, colleague and vascular surgeon Dr. Melina Kibbe is a vascular surgeon at the VA Chicago Medical Center. If necessary, we will work with Drs. McCarthy and Kibbe to identify additional participants from Cook County Hospital and VA Chicago, where many patients are members of under-represented minority populations.**F. Inclusion of Children.** PAD does not affect children. Therefore, children will not be included in the PROPEL study.

## LITERATURE CITED

1. Subramaniam V, Waller EK, Murrow JR, Manatunga A, Lonial S, Kasirajan K, Sutcliffe D, Harris W, Taylor W, Alexander R. Bone marrow mobilization with granulocyte macrophage colony-stimulating factor improves endothelial dysfunction and exercise capacity in patients with peripheral arterial disease. *Am Heart J* 2009;158:53-60.
2. Sandri M, Adams V, Gielen S, Linke A, Lenk K, Kränkel N, Lenz D, Erbs S, Scheinert D, Mohr FW, Schuler G, Hambrecht R. Effects of exercise and ischemia on mobilization and functional activation of blood-derived progenitor cells in patients with ischemic syndromes: results of 3 randomized studies. *Circulation* 2005;111:3391-3399.
3. Van Royen N, Schirmer SH, Atasever B, Behrens CYH, Ubbink D, Buschmann EE, Voskuil M, Bot P, Hoefler I, Schlingemann RO, Biemond BJ, Tijssen JG, Bode C, Schaper W, Oskam J, Legemate DA, Piek JJ, Buschmann I. START Trial: A pilot study on Stimulation or ARTeriogenesis using subcutaneous application of granulocyte-macrophage colony stimulating factor as a new treatment for peripheral arterial disease. *Circulation* 2005;112:1040-1046.
4. Arai M, Misao Y, Nagai H, Kawasaki M, Nagashima K, Suzuki K, Tsuchiya K, Otsuka S, Uno Y, Takemura G, Nishigaki K, Minatoguchi S, Fujiwara H. Granulocyte colony-stimulating factor: A noninvasive regeneration therapy for treating atherosclerotic peripheral arterial disease. *Circ J* 2006;70:1093-1098.

- 062  
063 5. Allison MA, Ho E, Denenberg JO, Langer RD, Newman AB, Fabsitz RR, Criqui MH. Ethnic-specific  
064 prevalence of peripheral arterial disease in the United States. *Am J Prev Med* 2007;32:328-333.  
065
- 066 6. McDermott MM, Greenland P, Liu K, Guralnik JM, Criqui MH, Dolan NC, Chan C, Celic L, Pearce WH,  
067 Schneider JR, Sharma L, Clark E, Gibson D, Martin GJ. Leg symptoms in peripheral arterial disease.  
068 Associated clinical characteristics and functional impairment. *JAMA* 2001;286:1599-1606.  
069
- 070 7. McDermott MM, Liu K, Greenland P, Guralnik JM, Criqui MH, Chan C, Pearce WH, Schneider JR, Ferrucci  
071 L, Celic L, Taylor LM, Vonesh E, Martin GJ, Clark E. Functional decline in peripheral arterial disease:  
072 associations with the ankle brachial index and leg symptoms. *JAMA* 2004;292:453-461.  
073
- 074 8. McDermott MM, Greenland P, Liu K, Guralnik JM, Celic L, Criqui MH, Chan C, Martin GJ, Schneider J,  
075 Pearce WH, Taylor LM, Clark E. The ankle brachial index as a measure of leg functioning and physical activity  
076 in peripheral arterial disease: the walking and leg circulation study. *Ann Intern Med* 2002;136:873-883.  
077
- 078 9. Gardner AW, Montgomery PS. Impaired balance and higher prevalence of falls in subjects with intermittent  
079 claudication. *J Gerontol A Biol Sci Med Sci* 2001;56(7):M454-458.  
080
- 081 10. Gardner AW, Montgomery PS, Killewich LA. Natural history of physical function in older men with  
082 intermittent claudication. *J Vasc Surg* 2004;40(1):73-78.  
083
- 084 11. McDermott MM, Guralnik JM, Tian L, Ferrucci L, Liu K, Liao Y, Criqui MH. Baseline functional performance  
085 predicts the rate of mobility loss in persons with peripheral arterial disease. *J Am Coll Cardiol* 2007;50:974-  
086 982.  
087
- 088 12. Fried LP, Guralnik JM. Disability in older adults: evidence regarding significance, etiology, and risk. *J Am*  
089 *Geriatr Soc* 1997;45:92-100.  
090
- 091 13. McDermott MM, Tian L, Liu K, Guralnik JM, Ferrucci L, Tan J, Pearce WH, Schneider JR, Criqui MH.  
092 Prognostic value of functional performance for mortality in patients with peripheral artery disease. *JACC*  
093 2008;51:1482-1489. PMID: 18402904  
094
- 095 14. Dawson DL, Cutler BS, Meissner MH, Strandness DEJ. Cilostazol has beneficial effects in treatment of  
096 intermittent claudication: Results from a multi-center, randomized, prospective, double-blind trial. *Circulation*  
097 1998;98:678-686.  
098
- 099 15. Money SR, Herd JA, Isaacsohn JL, Davidson M, Cutler B, Heckman J, Forbes WP. Effect of cilostazol on  
100 walking distances in patients with intermittent claudication caused by peripheral vascular disease. *J Vasc Surg*  
101 1998;27:267-274.  
102
- 103 16. Beebe HG, Dawson DL, Cutler BS, Herd JA, Strandness DE Jr, Bortey EB, Forbes WP. A new  
104 pharmacological treatment for intermittent claudication: results of a randomized, multi-center trial. *Arch Intern*  
105 *Med* 1999;159:2041-2050.  
106
- 107 17. Girolami B, Bernardi E, Prins MH, Ten Cate JW, Hettiarachchi R, Prandoni P, Girolami A, Buller HR.  
108 Treatment of intermittent claudication with physical training, smoking cessation, pentoxifylline, or nafronyl: A  
109 meta-analysis. *Arch Intern Med* 1999;159:337-345.  
110
- 111 18. Ben Shoshan J and George J. Endothelial progenitor cells as therapeutic vector in cardiovascular  
112 disorders: From Experimental models to human trials. *Pharmacology and Therapeutics* 2007:25-36.  
113
- 114 19. Takahashi T, Kalka C, Masuda H, Chen D, Silver M, Kearney M, Magner M, Isner JM, Asahara T.  
115 Ischemia- and cytokine-induced mobilization of bone marrow-derived endothelial progenitor cells for

116 neovascularization. *Nat Med* 1999; 5:434–438.

117  
118 20. Takazoe M, Matsui T, Motoya S, Matsumoto T, Hibi T, Watanabe M. Sargramostim in patients with  
119 Crohn's disease: Results of a phase 1-2 study. *J Gastroenterol* 2009;44:535-543.

120  
121 21. Laufs U, Werner N, Link A, Endres M, Wassmann S, Jürgens K, Miche E, Böhm M, Nickenig G. Physical  
122 Training Increases Endothelial Progenitor Cells, Inhibits Neointima Formation, and Enhances Angiogenesis.  
123 *Circulation* 2004;109:220-226.

124  
125 22. Asahara T, Murohara T, Sullivan A, Silver M, van der Zee R, Li T, Witzenbichler B, Schatteman G, Isner  
126 JM. Isolation of Putative Progenitor Endothelial Cells for Angiogenesis. *Science* 1997;275:964-967.

127  
128 23. Murasawa S, Asahara T. Cardiogenic potential of endothelial progenitor cells. *Ther Adv Cardiovasc Dis*  
129 2008 Oct;2(5):341-348.

130  
131 24. Thijssen DHJ, Torella D, Hopman MTE, Ellison GM. The role of endothelial progenitor and cardiac stem  
132 cells in the cardiovascular adaptations to age and exercise. *Frontiers in Bioscience* 2009;14:4685-4702.

133  
134 25. Hill JM, Zalos G, Halcox JP, Schenke WH, Waclawiw MA, Quyyumi AA, Finkel T. Circulating endothelial  
135 progenitor cells, vascular function, and cardiovascular risk. *N Engl J Med* 2003;348:593-600.

136  
137 26. Taylor DA, Zenovich AG. Cardiovascular cell therapy and endogenous repair. *Diabetes Obes Metab*  
138 2008 Nov;10 Suppl 4:5-15.

139  
140 27. Zenovich AG, Taylor DA. Atherosclerosis as a disease of failed endogenous repair. *Front Biosci* 2008  
141 May 1;13:3621-3636. Review

142  
143 28. Alobaid N, Alnaeb ME, Sales KM, Seifalian AM, Mikhailidis DP, Hamilton G. Endothelial progenitor cells  
144 and their potential clinical applications in peripheral arterial disease. *Endothelium* 2005 Sep-Dec;12(5-6):243-  
145 250.

146  
147 29. Li B, Sharpe EE, Maupin AB, Teleron AA, Pyle AL, Carmeliet P, Young PP. VEGF and PIGF promote  
148 adult vasculogenesis by enhancing EPC recruitment and vessel formation at the site of tumor  
149 neovascularization. *FASEB J* 2006;20:1495-1497.

150  
151 30. Murohara T, Ikeda H, Duan J, Shintani S, Sasaki K, Eguchi H, Onitsuka I, Matsui K, Imaizumi T.  
152 Transplanted cord blood-derived endothelial precursor cells augment postnatal neovascularization. *J Clin*  
153 *Invest* 2000;105(11):1527-1536.

154  
155 31. Devanesan AJ, Laughlan KA, Girn HRS, Homer-Vanniaskinkam S. Endothelial progenitor cells as a  
156 therapeutic option in peripheral arterial disease. *Eur J Vasc Endovasc Surg* 2009;38:475-481.

157  
158 32. Ishida A, Ohya Y, Sakuda H, Ohshiro K, Higashiuesato Y, Nakaema M, Matsurbara S, Yakabi S, Kakihana  
159 A, Ueda M, Miyagi C, Yamane N, Koja K, Komori K, Takishita S. Autologous peripheral blood mononuclear  
160 cell implantation for patients with peripheral arterial disease improves limb ischemia. *Circ J* 2005;69:1260-  
161 1265.

162  
163 33. Kovacic JC, Muller DWM, Graham RM. Actions and therapeutic potential of G-CSF and GM-CSF in  
164 cardiovascular disease. *Journal of molecular and cellular cardiology*;2007:19-33.

165  
166 34. Hirsch AT, Criqui MH, Treat-Jacobson D, Regensteiner JG, Creager MA, Olin JW, Krook SH,  
167 Hunninghake DB, Comerota AH, Walsh ME, McDermott MM, Hiatt WR. Peripheral arterial disease detection,  
168 awareness, and treatment in primary care. *JAMA* 2001;286(11):1317-1324.



- 170 35. Hirsch AT, Haskal ZJ, Hertzner NR, Bakal CW, Creager MA, Halperin JL, Hiratzka LF, Murphy WR, Olin  
171 JW, Puschett JB, Rosenfield KA, Sacks D, Stanley JC, Taylor LM Jr, White CJ, White J, White RA, Antman  
172 EM, Smith SC Jr, Adams CD, Anderson JL, Faxon DP, Fuster V, Gibbons RJ, Hunt SA, Jacobs AK, Nishimura  
173 R, Ornato JP, Page RL, Riegel B; American Association for Vascular Surgery/Society for Vascular Surgery;  
174 Society for Cardiovascular Angiography and Interventions; Society for Vascular Medicine and Biology; Society  
175 of Interventional Radiology; ACC/AHA Task Force on Practice Guidelines. ACC/AHA Guidelines for the  
176 Management of Patients with Peripheral Arterial Disease (lower extremity, renal, mesenteric, and abdominal  
177 aortic): a collaborative report from the American Associations for Vascular Surgery/Society for Vascular  
178 Surgery, Society for Cardiovascular Angiography and Interventions, Society for Vascular Medicine and Biology,  
179 Society of Interventional Radiology, and the ACC/AHA Task Force on Practice Guidelines (writing committee to  
180 develop guidelines for the management of patients with peripheral arterial disease)--summary of  
181 recommendations. *J Vasc Interv Radiol* 2006;17:1383-1397.
- 182
- 183 36. Regensteiner JG. Exercise rehabilitation for the patient with intermittent claudication: a highly effective yet  
184 underutilized treatment. *Curr Drug Targets Cardiovasc Haematol Disord* 2004;4:233-239.
- 185
- 186 37. Ceradini DJ, Kulkarni AR, Callaghan MJ, Tepper OM, Bastidas N, Kleinman ME, Capla JM, Galiano RD,  
187 Levine JP, Gurtner GC. Progenitor cell trafficking is regulated by hypoxic gradients through HIF-1 induction of  
188 SDF-1. *Nat Med* 2004;10:858–864.
- 189
- 190 38. Schioppa T, Uranchimeg B, Sacconi A, Biswas SK, Doni A, Rapisarda A, Bernasconi S, Sacconi S,  
191 Nebuloni M, Vago L, Mantovani A, Melillo G, Sica A. Regulation of the chemokine receptor CXCR4 by hypoxia.  
192 *J Exp Med* 2003;198:1391–1402.
- 193
- 194 39. Takahashi T, Kalka C, Masuda H, Chen D, Silver M, Kearney M, Magner M, Isner JM, Takayuki A.  
195 Ischemia- and cytokine-induced mobilization of bone marrow-derived endothelial progenitor cells for  
196 neovascularization. *Nat Med* 1999; 5:434–438.
- 197
- 198 40. Misao Y, Takemura G, Arai M, Ohno T, Onogi H, Takahashi T, Minatoguchi S, Fujiwara T, Fujiwara H.  
199 Importance of recruitment of bone marrow-derived CXCR4(+) cells in post-infarct cardiac repair mediated by  
200 G-CSF. *Cardiovasc Res* 2006;71:455-465.
- 201
- 202 41. Abbott JD, Huang Y, Liu D, Hickey R, Krause DS, Giordano FJ. Stromal cell-derived factor-1alpha plays a  
203 critical role in stem cell recruitment to the heart after myocardial infarction but is not sufficient to induce homing  
204 in the absence of injury. *Circulation* 2004;110:3300–3305.
- 205
- 206 42. Butler JM, Guthrie SM, Koc M, Afzal A, Caballero S, Brooks HL, Mames RN, Segal MS, Grant MB, Scott  
207 EW. SDF-1 is both necessary and sufficient to promote proliferative retinopathy. *J Clin Invest* 2005;115:86–93.
- 208
- 209 43. De Falco E, Porcelli D, Torella AR, Straino S, Iachininoto MG, Orlandi A, Truffa S, Biglioli P, Napolitano M,  
210 Capogrossi MC, Pesce M. SDF-1 involvement in endothelial phenotype and ischemia induced recruitment of  
211 bone marrow progenitor cells. *Blood* 2004;104:3472–3482.
- 212
- 213 44. McDermott MM, Ades P, Guralnik JM, Dyer A, Ferrucci L, Liu K, Nelson M, Lloyd-Jones D, Van Horn L,  
214 Garside D, Kibbe M, Domanchuk K, Stein JH, Liao Y, Tao H, Green D, Pearce WH, Schneider JR, McPherson  
215 D, Laing ST, McCarthy WJ, Shroff A, Criqui MH. Treadmill exercise and resistance training in patients with  
216 peripheral arterial disease with and without intermittent claudication: a randomized controlled trial. *JAMA*  
217 2009;301(2):165-174. PMID: 19141764
- 218
- 219 45. Steiner S, Niessner A, Ziegler S, Richter B, Seidinger D, Pleiner J, Penka M, Wolzt M, Huber K, Wojta J,  
220 Minar E, Kopp CW. Endurance training increases the number of endothelial progenitor cells in patients with  
221 cardiovascular risk and coronary artery disease. *Atherosclerosis* 2005;181: 305–310.
- 222

- 223 46. Paul JD, Powell TM, Thompson M, Benjamin M, Rodrigo M, Carlow A, Annavajjhala V, Shiva S, Dejam A,  
224 Gladwin MT, McCoy JP, Zalos G, Press B, Murphy M, Hill JM, Csako G, Waclawiw MA, Cannon RO 3<sup>rd</sup>.  
225 Endothelial progenitor cell mobilization and increased intravascular nitric oxide in patients undergoing cardiac  
226 rehabilitation. *J Cardiopulm Rehabil Prev* 2007;27:65-73.
- 227  
228 47. Thijssen DH, Vos JB, Verseyden C, van Zonneveld AJ, Smits P, Sweep FC, Hopman MT, de Boer HC.  
229 Haematopoietic stem cells and endothelial progenitor cells in healthy men: effect of aging and training. *Aging*  
230 *Cell* 2006;5:495-503.
- 231  
232 48. Cesari F, Sofi F, Caporale R, Capalbo A, Marcucci R, Macchi C, Lova RM, Cellai T, Vannucci M, Gensini  
233 GF, Abbate R, Gori AM. Relationship between exercise capacity, endothelial progenitor cells and  
234 cytochemokines in patients undergoing cardiac rehabilitation. *Thromb Haemost* 2009;101:521-526.
- 235  
236 49. Fadini GP, Miorin M, Facco M, Bonamico S, Baesso I, Grego F, Menegolo M, de Kreutzenberg SV, Tiengo  
237 A, Agostini C, Avogaro A. Circulating endothelial progenitor cells are reduced in peripheral vascular  
238 complications of Type 2 Diabetes Mellitus. *J Am Coll Cardiol* 2005;45:1449-1457.
- 239  
240 50. Fadini GP, Sartore S, Albiero M, Baesso I, Murphy E, Menegolo M, Grego F, Vigili de Kreutzenberg S,  
241 Tiengo A, Agostini C, Avogaro A. Number and function of endothelial progenitor cells as a marker of severity  
242 for diabetic vasculopathy. *Arterioscler Thromb Vasc Biol* 2006;26:2140-2146.
- 243  
244 51. McDermott MM, Ferrucci L, Liu K, Guralnik JM, Tian L, Liao Y, Criqui MH. Leg Symptom Categories and  
245 Rates of Mobility Decline in Peripheral Arterial Disease. *J Am Geriatr Soc* (In Press).
- 246  
247 52. Greig C, Butler F, Skelton D, Mahmud S, Young A. Treadmill walking in old age may not reproduce the real  
248 life situation. *J Am Geriatr Soc* 1993;41:15-18.
- 249  
250 53. Swerts PMJ, Mostert R, Wouters EFM. Comparison of corridor and treadmill walking in patients with  
251 severe chronic obstructive pulmonary disease. *Phys Ther* 1990;70:439-442.
- 252  
253 54. Peeters P, Mets T. The six-minute walk as an appropriate exercise test in elderly patients with chronic  
254 heart failure. *J Gerontol Med Sci* 1996;51A:M147-M151
- 255  
256 55. McDermott MM, Guralnik JM, Tian L, Ferrucci L, Liao Y, Sharma L, Criqui MH. Associations of borderline  
257 and low normal ankle-brachial index values with functional decline at 5-year follow-up: the WALCS (Walking  
258 and Leg Circulation Study). *J Am Coll Cardiol* 2009;53:1063-1064. PMID: 19298919
- 259  
260 56. McDermott MM, Guralnik JM, Ferrucci L, Tian L, Liu K, Liao Y, Green D, Sufit R, Hoff F, Nishida T,  
261 Sharma L, Pearce WH. Asymptomatic peripheral arterial disease is associated with more adverse lower  
262 extremity characteristics than intermittent claudication. *Circulation* 2008;117:2484-2491. PMID: 18458172
- 263  
264 57. McDermott MM, Fried L, Simonsick E, Ling S, Guralnik JM. Asymptomatic peripheral arterial disease is  
265 independently associated with impaired lower extremity functioning: the women's health and aging study.  
266 *Circulation* 2000;101:1007-1012.
- 267  
268 58. McDermott MM, Domanchuk K, Dyer A, Ades P, Kibbe M, Criqui MH. Recruiting participants with  
269 peripheral arterial disease for clinical trials: Experience from the study to improve leg circulation (SILC). *J Vasc*  
270 *Surg* 2009;49:653-659. PMID: 19135834
- 271  
272 60. Lijmer JG, Hunink MG, van den Dungen JJ, Loonstra J, Smit AJ. ROC analysis of noninvasive tests for  
273 peripheral arterial disease. *Ultrasound Med Biol* 1996;22:391-398.
- 274  
275 61. Bernstein EF, Fronck A. Current status of non-invasive tests in the diagnosis of peripheral arterial  
276 disease. *Surg Clin North Am* 1982;62:473-487.

- 277  
278 62. Fung YC. Blood flow in arteries: pressure and velocity waves in large arteries and the effects of geometric  
279 nonuniformity. In *Biodynamics – Circulation* New York: Springer-Verlag, 1984:133-136.  
280
- 281 63. Yao JS. New techniques of objective arterial evaluation. *Arch Surg* 1973;106:600-604.  
282
- 283 64. Huen R, Papassotiropoulos A, Jennssen F. The validity of psychometric instruments for detection of  
284 dementia in the elderly general population. *Int J Geriatr Psychiatry* 1998;13:368-380.  
285
- 286 65. Gardner AW, Poehlman ET. Exercise rehabilitation programs for the treatment of claudication pain. A  
287 meta-analysis. *JAMA* 1995;274:975-980.  
288
- 289 66. Stewart KJ, Hiatt WR, Regensteiner JG, Hirsch AT. Exercise training for claudication. *N Engl J Med*  
290 2002;347:1941-1951.  
291
- 292 67. Bendermacher BL, Willigendael EM, Teijink JA, Prins MH. Supervised exercise therapy versus non-  
293 supervised exercise therapy for intermittent claudication. *Cochrane Database Syst Rev* 2006;2:CD005263.  
294
- 295 68. Murasawa S, Asahara T. Cardiogenic potential of endothelial progenitor cells. *Ther Adv Cardiovasc Dis*  
296 2008 Oct;2(5):341-348.  
297
- 298 69. Thijssen DHJ, Torella D, Hopman MTE, Ellison GM. The role of endothelial progenitor and cardiac stem  
299 cells in the cardiovascular adaptations to age and exercise. *Frontiers in Bioscience* 2009;14:4685-4702.  
300
- 301 70. Borg GV. Psychophysical bases of perceived exertion. *Med Sci Sports Exerc* 1982;14:377-381.  
302
- 303 71. Dunbar CC, Goris C, Michielli DW, Kalinski MI. Accuracy and reproducibility of an exercise prescription  
304 based on Ratings of Perceived Exertion for treadmill and cycle ergometer exercise. *Perceptual & Motor Skills*  
305 Jun 1994;78(3Pt2): 1335-1344.  
306
- 307 72. Eston RG, Williams JG. Reliability of ratings of perceived effort regulation of exercise intensity. *British J*  
308 *of Sports Med* Dec 1988;22(4):153-155.  
309
- 310 73. Feriche B, Chicharro JL, Vaquero AF, Perez M, Lucia A. The use of a fixed value of RPE during a ramp  
311 protocol. Comparison with the ventilatory threshold. *J Sports Med & Physical Fitness* Mar 1998;38(1): 35-38.  
312
- 313 74. Smith TJ, Khatcheressian J, Lyman GH, Ozer H, Armitage JO, Balducci L, Bennett CL, Cantor SB,  
314 Crawford J, Cross SJ, Demetri G, Desch CE, Pizzo PA, Schiffer CA, Schwartzberg L, Somerfield MR, Somlo  
315 G, Wade JC, Wade JL, Winn RJ, Wozniak AJ, Wolff AC. 2006 Update of recommendations for use of white  
316 blood cell growth factors: An evidence-based clinical practice guideline. *Journal of Clinical Oncology*  
317 2006;24:3187-3205.  
318
- 319 75. Takazoe M, Matsui T, Motoya S, Matsumoto T, Hibi T, Watanabe M. Sargramostim in patients with  
320 Crohn's disease: Results of a phase 1-2 study. *J Gastroenterol* 2009;44:535-543.  
321
- 322 76. Kawamoto A, Katayama M, Handa N, Kinoshita M, Takano H, Horii M, Sadamoto K, Yokoyama A,  
323 Yamanaka T, Onodera R, Kuroda A, Baba R, Kaneko Y, Tsukie T, Kurimoto Y, Okada Y, Kihara Y, Morioka S,  
324 Fukushima M, Asahara T. Intramuscular transplantation of G-CSF-Mobilized CD34+ cells in patients with  
325 critical limb ischemia: A Phase I/IIa, Multicenter, Single-blinded, dose-escalation clinical trial. *Stem Cells*  
326 2009;27:2857-2864.  
327
- 328 77. Tateishi-Yuyama E, Matsubara H, Murohara T and the Therapeutic Angiogenesis using Cell  
329 Transplantation (TACT) Study Investigators. Therapeutic angiogenesis for patients with limb ischemia by

- 330 autologous transplantation of bone-marrow cells: A pilot study and a randomized controlled trial. *Lancet*  
331 2002;360:427-435.
- 332
- 333 78. Chen SL, Fang WW, Quian J, Ye F, Liu YH, Shan SJ, Zhang JJ, Lin S, Liao LM, Zhao RC. Improvement of  
334 cardiac function after transplantation of autologous bone marrow mesenchymal stem cells in patients with  
335 acute myocardial infarction. *Chin Med J* 2004;117:1443-1448.
- 336
- 337 79. Kueth F, Richartz BM, Kasper C, Sayer HG, Hoeffken K, Werner GS, Figulla HR. Autologous  
338 intracoronary mononuclear bone marrow cell transplantation in chronic ischemic cardiomyopathy in humans.  
339 *Int J Cardiol* 2005;100:485-491.
- 340
- 341 80. Pasquet S, Sovalat H, Henon P, Bischoff N, Arkam Y, Ojeda-Urbe M, Bouar R, Rimelen V, Brink I,  
342 Dallemand R, Monassier JP. Long-term benefit of intracardiac delivery of autologous granulocyte-colony-  
343 stimulating factor-mobilized blood CD34+ cells containing cardiac progenitors on regional heart structure and  
344 function after myocardial infarct. *Cytotherapy* 2009;11:1002-1015.
- 345
- 346 81. McDermott MM, Ades PA, dyer A, Gurlanik JM, Kibbe M, Criqui MH. Corridor-based functional  
347 performance measures correlate better with physical activity during daily life than treadmill measures in  
348 persons with peripheral arterial disease. *J Vasc Surg* 2008;48:1231-1237. PMID: 18829215
- 349
- 350 82. Gardner AW, Skinner JS, Cantwell BW, Smith LK. Progressive vs. single-stage treadmill tests for  
351 evaluation of claudication. *Med Sci Sports Exerc* 1991;23:402-408.
- 352
- 353 83. Gardner AW, Skinner JS, Cantwell BW, Smith LK. Effects of handrail support on claudication and  
354 hemodynamic responses to single-stage and progressive treadmill protocols in peripheral vascular occlusive  
355 disease. *Am J Cardiol* 1991;67:99-105.
- 356
- 357 84. Hiatt WR, Regensteiner JG, Hargarten ME, Wolfel EE, Brass EP. Benefit of exercise conditioning for  
358 patients with peripheral arterial disease. *Circulation* 1990;81:602-609.
- 359
- 360 85. Montgomery PS, Gardner AW. The clinical utility of a six-minute walk test in peripheral arterial occlusive  
361 disease patients. *J Am Geriatr Soc* 1998;46:706-711.
- 362
- 363 86. Payvandi L, Dyer A, McPherson D, Ades P, Stein J, Liu K, Ferrucci L, Criqui MH, Guralnik JM, Lloyd-  
364 Jones D, Kibbe MR, Liang ST, Kane B, Pearce WH, Verta M, McCarthy MJ, Schneider JR, Shroff A,  
365 McDermott MM. Physical activity during daily life and brachial artery flow-mediated dilation in peripheral arterial  
366 disease. 2009;14:193-201.
- 367
- 368 87. Yeboah J, Folsom AR, Burke GL, Johnson c, Polak JF, Post W, Lima JA, Crouse JR, Herrington DM.  
369 Predictive value of brachial flow-mediated dilation for incident cardiovascular events in a population-based  
370 study: the multi-ethnic study of atherosclerosis. *Circulation* 2009;120:502-509.
- 371
- 372 88. Gottdiener JS, Bednarz J, Devereux RM, Gardin J, Klein A, Manning WJ, Morehead A, Kitzman D, Oh J,  
373 Quinones M, Schiller NB, Stein JH, Weissman NJ; American Society of Echocardiography. American Society  
374 of Echocardiography recommendations for use of echocardiography in clinical trials. *J Am Soc Echocardiogr*  
375 2004;17:1086-1119.
- 376
- 377 89. Zeiher AM, Krause T, Schachinger V, Minners J, Moser E. Impaired endothelium-dependent vasodilation  
378 of coronary resistance vessels is associated with exercise-induced myocardial ischemia. *Circulation* 1995  
379 91(9):2345-2352.
- 380
- 381 90. Zeiher AM, Schachinger V, Minners J. Long-term cigarette smoking impairs endothelium-dependent  
382 coronary arterial vasodilator function. *Circulation* 1995;92(5):1094-1100.
- 383

- 384 91. Ferraro KJ, Su YP. Physician-evaluated and self-reported morbidity for predicting disability. *J Clin*  
385 *Epidemiol* 1996;49:989-995.
- 386
- 387 92. Fowles JB, Fowler EJ, Craft C. Validation of claims diagnoses and self-reported conditions compared with  
388 medical records for selected chronic diseases. *J Ambulatory Care Manage* 1998;21:24-34.
- 389
- 390 93. Ferraro KF, Yaping S. Physician-evaluated and self-reported morbidity for predicting disability. *Am J*  
391 *Public Health* 2000;90:103-108.
- 392
- 393 94. Roberts RO, Bergstralh EJ, Schmidt L, Jacobsen SJ. Comparison of self-reported and medical record  
394 health care utilization measures. *J Clin Epidemiol* 1996;49:989-995.
- 395
- 396 95. Bergmann MM, Byers T, Freedman DS, Mokdad A. Validity of self-reported diagnoses leading to  
397 hospitalization: A comparison of self-reports with hospital records in a prospective study of American adults.  
398 *Am J Epidemiol* 1998;147:969-977.
- 399
- 400 96. Wagenknecht LE, Burke GL, Perkins LL, Haley NJ, Friedman GD. Misclassification of smoking status in  
401 the CARDIA study: A comparison of self-report with serum cotinine levels. *Am J Public Health* 1992;82:33-36.
- 402
- 403 96. Zhang M, Anastasios A, Tsiatis, Davidian M. Improving efficiency of inferences in randomized clinical  
404 trials using auxiliary covariates, *Biometrics* 2008;64:707-715.
- 405
- 406 97. Vidula H, Tian L, Liu K, Criqui MH, Ferrucci L, Pearce WH, Greenland P, Green D, Tan J, GarsideDB,  
407 Guralnik J, Ridker PM, Rifai N, McDermott MM. Biomarkers of inflammation and thrombosis as predictors of  
408 near-term mortality in patients with peripheral arterial disease: a cohort study. *Ann Intern Med* 2008;148:85-  
409 93.
- 410
- 411 98. McDermott MM, Liu K, Ferrucci L, Criqui MH, Greenland P, Guralnik JM, Tian L, Schneider JR, Pearce  
412 WH, Tan J, Martin GJ. Physical performance in peripheral arterial disease: a slower rate of decline in patients  
413 who walk more. *Ann Intern Med* 2006;144:10-20.
- 414
- 415 99. Anderlini P, Przepiorka D, Champlin R, Korbling M. Biologic and clinical effects of granulocyte colony-  
416 stimulating factor in normal individuals. *Blood* 1996;88:2819-2825.
- 417
- 418 100. Dincer AP, Gottschall J, Margolis DA. Splenic rupture in a parental donor undergoing peripheral blood  
419 progenitor cell mobilization. *J Pediatr Hematol Oncol* 2004;26:761-763.
- 420
- 421 101. Kovacic JC, Macdonald P, Freund J, Rasko JE, Allan R, Fernandes VB, Ma D, Moore J, Graham RM.  
422 Profound thrombocytopenia related to G-CSF. *Am J Hematol* 2007;82:229-230.
- 423
- 424 102. McDermott MM, Liu K, Criqui MH, Ruth K, Goff D, Saad MF, Wu C, Homma S, Sharrett AR. Ankle-  
425 brachial index and subclinical cardiac and carotid disease: the multi-ethnic study of atherosclerosis. *Am J*  
426 *Epidemiol* 2005;162:33-41.
